# Supplementary material for: Below the 12-vertex: 10-vertex carborane anions as non-corrosive, halide free, electrolytes for rechargeable Mg batteries
Source: Royal Society of Chemistry journal article supplement (doi:10.1039/c7cc01570d), 2017-01-01
Supplement: c7cc01570d1.pdf [file c7cc01570d1.pdf]

## **Below the 12-vertex: 10-Vertex Carborane Anions as Non-corrosive, Halide Free, Electrolytes for Rechargeable Mg Batteries.**

Scott. G. McArthur<sup>a</sup>, Rahul Jay<sup>b</sup>, Linxiao Geng<sup>b</sup>, Juchen Guo<sup>\*bc</sup> and Vincent Lavallo<sup>\*a</sup>

<sup>a</sup>Department of Chemistry, University of California Riverside, Riverside, CA 92521, USA. E-mail: vincent.lavallo@ucr.edu

<sup>b</sup>Department of Chemical and Environmental Engineering, University of California Riverside, Riverside, CA 92521, USA. E-mail: jguo@engr.ucr.edu

<sup>c</sup>Materials Science and Engineering Program, University of California Riverside, Riverside, CA 92521, USA.

### **Table of Contents**

|                                                                        |          |
|------------------------------------------------------------------------|----------|
| Synthesis and Spectroscopic Data                                       | S2 - S5  |
| X-ray Crystallographic Data                                            | S6 - S39 |
| Ionic Conductivity                                                     | S30      |
| Electrochemical performance of Mg-Mo <sub>6</sub> S <sub>8</sub> Cells | S31      |
| Image of Coin Cell                                                     | S31      |
| References                                                             | S31      |

## General Considerations

Unless otherwise stated all manipulations were carried out using standard Schlenk or glovebox techniques ( $\text{O}_2$ ,  $\text{H}_2\text{O}$  < 1ppm) under a dinitrogen or argon atmosphere. Solvents tetrahydrofuran (THF), 1,2-Dimethoxyethane (DME), and tetraethylene glycol dimethyl ether (tetraglyme or G4) were dried on K, Na or  $\text{CaH}_2$ , and distilled under argon before use. NMR spectra were recorded on Bruker Avance 300 MHz, Varian Inova 300 MHz, Varian Inova 400 MHz, or Varian Inova 500 MHz spectrometers. NMR chemical shifts are reported in parts per million (ppm).  $^1\text{H}$  NMR and  $^{13}\text{C}$  NMR chemical shifts were referenced to residual solvent.  $^{11}\text{B}$  NMR chemical shifts were externally referenced to  $\text{BF}_3\text{OEt}_2$ .

## Synthesis of $2[\text{Mg}^{+2}]$

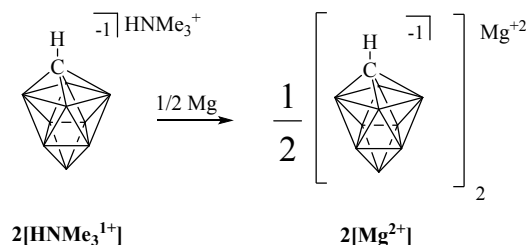

$2[\text{HNMe}_3^{+1}]$  (2.0 g, 10.3 mmol) was added to a suspension of Mg powder (4.0 g, 165 mmol) in a minimal amount of THF (5mL) and the resulting suspension was stirred for 1 hr. After 1 hr, additional THF (30mL) was added and the suspension was left to stir for 24 hours. The THF solution was then filtered through a medium porosity fritted funnel. The collected precipitate of white powder and excess magnesium was washed with DME, dissolving the white powder of the collected precipitate. Unreacted magnesium powder was collected and reused. The DME solvent was removed under high vacuum, resulting in compound  $2[\text{Mg}^{+2}]$  as a white powder in 91% yield (4.1g 9.37 mmol). Once dried, compound  $2[\text{Mg}^{+2}]$  is only soluble in DME at cold temperatures  $-30^\circ\text{C}$  (**Note:**  $\text{Mg}^{2+}$  counter cation is coordinated to three DME molecules). This reaction is monitored by using  $^1\text{H}$  NMR by the disappearance of trimethyl ammonium counter cation peak at  $\delta = 3.19$  ppm in acetone-  $\text{d}_6$ . A crystal suitable for x-ray diffraction study was obtained by removing a concentrated sample of  $2[\text{Mg}^{+2}]$  in DME from the freezer at  $-30^\circ\text{C}$  and

allowing the sample to warm to room temperature.  $^1\text{H}$  NMR (300 MHz, acetone- $\text{d}_6$ , 25°C):  $\delta = 3.46$  (s, H), 3.28 (s, H), 2.50-0.75 (bm, 11 H, B-H) ppm;  $^{11}\text{B}$   $\{^1\text{H}\}$  NMR (96 MHz, acetone- $\text{d}_6$ , 25 °C):  $\delta = 37.1$ , -11.9, -17.4 ppm.

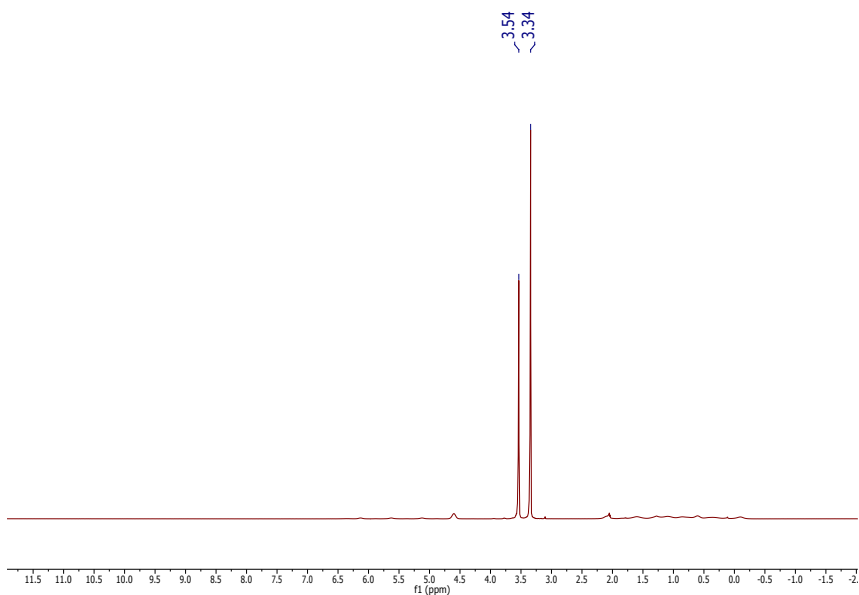

**Figure S1.**  $^1\text{H}$  NMR of  $2[\text{Mg}^{+2}]$  in acetone- $\text{d}_6$  (Note: peaks at 3.54 and 3.34 ppm are DME).

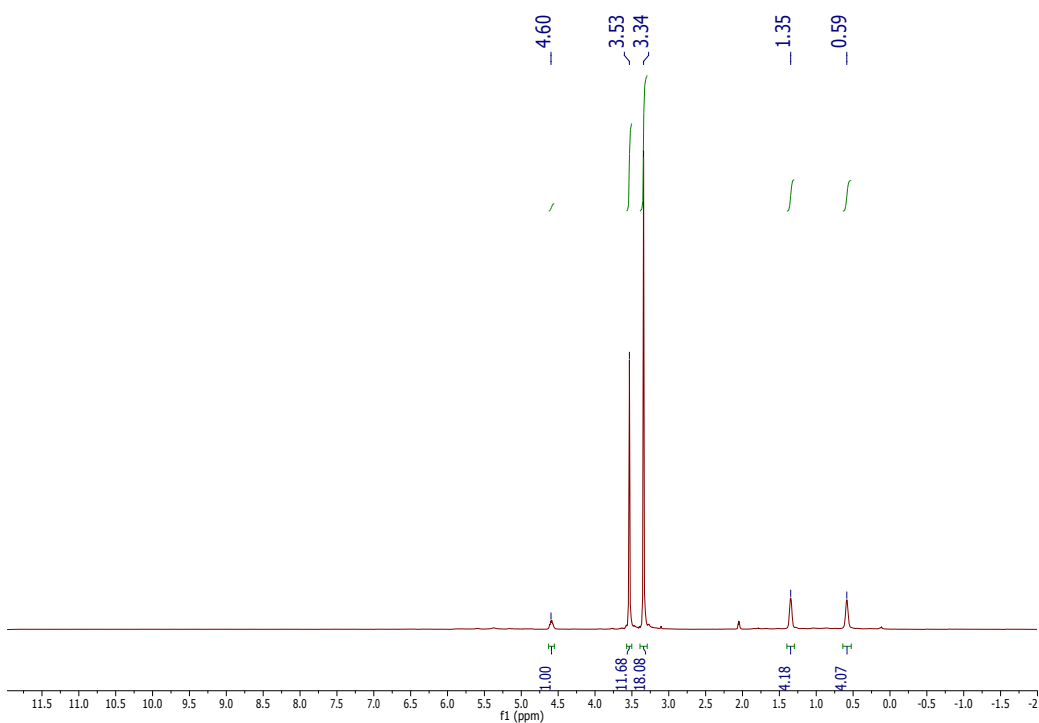

**Figure S2.**  $^1\text{H}\{^{11}\text{B}\}$  NMR of  $2[\text{Mg}^{2+}]$  in acetone- $\text{d}_6$ . Intergration of antipodal B-H of the carborane (4.60 ppm) and integration of DME signals (3.53 and 3.34 ppm) is used to determine the number of coordinated DME molecules.

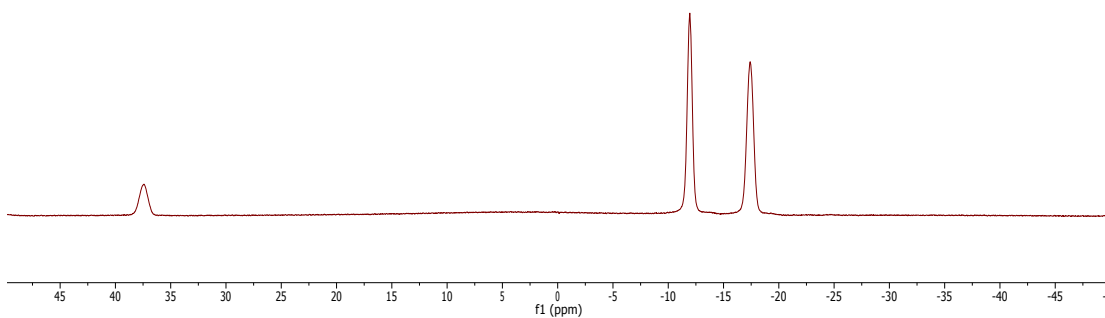

**Figure S3.**  $^{11}\text{B}\{^1\text{H}\}$  NMR of compound  $2[\text{Mg}^{+2}]$  in acetone.

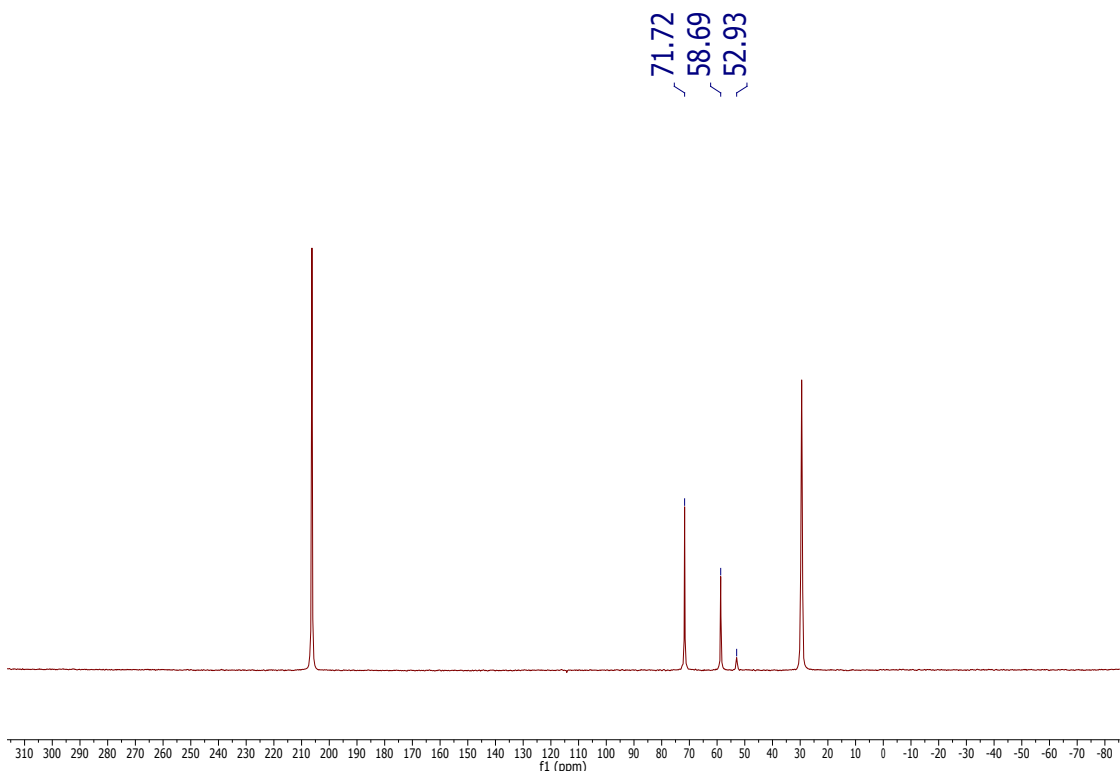

**Figure S4.**  $^{13}\text{C}\{^1\text{H}\}$  NMR of  $2[\text{Mg}^{2+}]$  in acetone.

### **X-Ray Structure Determination**

A colorless prism fragment (0.495 x 0.247 x 0.202 mm<sup>3</sup>) was used for the single crystal x-ray diffraction study of  $[\text{C}_4\text{H}_{10}\text{O}_2]_3\text{Mg}^{2+} \cdot 2[\text{CH}_{10}\text{B}_9]^-$  (sample vL170SM\_0m). The crystal was coated with paratone oil and mounted on to a cryo-loop glass fiber. X-ray intensity data were collected at 100(2) K on a Bruker APEX2 (ref. 1) platform-CCD x-ray diffractometer system (fine focus Mo-radiation,  $\lambda = 0.71073 \text{ \AA}$ , 50KV/30mA power). The CCD detector was placed at a distance of 5.0600 cm from the crystal.

A total of 3600 frames were collected for a sphere of reflections (with scan width of 0.30 in  $\omega$ , starting  $\omega$  and  $2\theta$  angles of  $-30^\circ$ , and  $\phi$  angles of  $0^\circ$ ,  $90^\circ$ ,  $120^\circ$ ,  $180^\circ$ ,  $240^\circ$ , and  $270^\circ$  for every 600 frames, 10 sec/frame exposure time). The frames were integrated using the Bruker SAINT software package (ref. 2) and using a narrow-frame integration algorithm. Based on a orthorhombic crystal system, the integrated frames yielded a total of 75989 reflections at a maximum  $2\theta$  angle of 61.996 ( $0.69 \text{ \AA}$  resolution), of which 10124 were independent reflections ( $R_{\text{int}} = 0.0484$ ,  $R_{\text{sig}} = 0.0306$ , redundancy = 7.5, completeness = 100%) and 9094 (89.8%) reflections were greater than  $2\sigma(I)$ . The unit cell parameters were,  $a = 20.7310(10) \text{ \AA}$ ,  $b = 10.6782(5) \text{ \AA}$ ,  $c = 14.3738(7) \text{ \AA}$ ,  $\alpha = \beta = \gamma = 90^\circ$ ,  $V = 3181.9(3) \text{ \AA}^3$ ,  $Z = 4$ , calculated density  $D_c = 1.114 \text{ g/cm}^3$ . Absorption corrections were applied (absorption coefficient  $\mu = 0.084 \text{ mm}^{-1}$ ; max/min transmission = 0.983/0.959) to the raw intensity data using the SADABS program (ref. 3).

The Bruker SHELXTL software package (ref. 4) was used for phase determination and structure refinement. The distribution of intensities ( $E^2 - 1 = 0.762$ ) and systematic absent

reflections indicated two possible space groups, Pna2(1) and Pnma. The space group Pna2(1) (#33) was later determined to be correct. Direct methods of phase determination followed by two Fourier cycles of refinement led to an electron density map from which most of the non-hydrogen atoms were identified in the asymmetric unit of the unit cell. With subsequent isotropic refinement, all of the non-hydrogen atoms were identified. There was one cation of  $[C_4H_{10}O_2]_3Mg^{2+}$  and two anions of  $[CH_{10}B_9]^-$  present in the asymmetric unit of the unit cell.

Atomic coordinates, isotropic and anisotropic displacement parameters of all the non-hydrogen atoms were refined by means of a full matrix least-squares procedure on F<sup>2</sup>. The H-atoms were included in the refinement in calculated positions riding on the atoms to which they were attached, except the H-atoms of the two CH-group of the carboranes were refined unrestrained. The refinement converged at R<sub>1</sub> = 0.0353, wR<sub>2</sub> = 0.0811, with intensity  $I > 2\sigma(I)$ . Absolute structure parameter cannot be reliably determined because no heavy atom is present in the structure. The largest peak/hole in the final difference map was 0.223/-0.157 e/Å<sup>3</sup>.

Table S1. Crystal data and structure refinement for vL170SM\_0m.

|                                   |                                                                   |          |
|-----------------------------------|-------------------------------------------------------------------|----------|
| Identification code               | vL170SM_0m                                                        |          |
| Empirical formula                 | C <sub>14</sub> H <sub>50</sub> B <sub>18</sub> Mg O <sub>6</sub> |          |
| Formula weight                    | 533.43                                                            |          |
| Temperature                       | 100(2) K                                                          |          |
| Wavelength                        | 0.71073 Å                                                         |          |
| Crystal system                    | Orthorhombic                                                      |          |
| Space group                       | P n a 21                                                          |          |
| Unit cell dimensions              | a = 20.7310(10) Å                                                 | α = 90°. |
|                                   | b = 10.6782(5) Å                                                  | β = 90°. |
|                                   | c = 14.3738(7) Å                                                  | γ = 90°. |
| Volume                            | 3181.9(3) Å <sup>3</sup>                                          |          |
| Z                                 | 4                                                                 |          |
| Density (calculated)              | 1.114 Mg/m <sup>3</sup>                                           |          |
| Absorption coefficient            | 0.084 mm <sup>-1</sup>                                            |          |
| F(000)                            | 1136                                                              |          |
| Crystal size                      | 0.495 x 0.247 x 0.202 mm <sup>3</sup>                             |          |
| Theta range for data collection   | 1.965 to 30.998°.                                                 |          |
| Index ranges                      | -30 ≤ h ≤ 30, -15 ≤ k ≤ 15, -20 ≤ l ≤ 20                          |          |
| Reflections collected             | 75989                                                             |          |
| Independent reflections           | 10124 [R(int) = 0.0484]                                           |          |
| Completeness to theta = 25.242°   | 100.0 %                                                           |          |
| Absorption correction             | Semi-empirical from equivalents                                   |          |
| Refinement method                 | Full-matrix least-squares on F <sup>2</sup>                       |          |
| Data / restraints / parameters    | 10124 / 1 / 364                                                   |          |
| Goodness-of-fit on F <sup>2</sup> | 1.020                                                             |          |
| Final R indices [I > 2σ(I)]       | R <sub>1</sub> = 0.0353, wR <sub>2</sub> = 0.0811                 |          |
| R indices (all data)              | R <sub>1</sub> = 0.0425, wR <sub>2</sub> = 0.0852                 |          |
| Absolute structure parameter      | ?                                                                 |          |
| Extinction coefficient            | n/a                                                               |          |
| Largest diff. peak and hole       | 0.223 and -0.157 e.Å <sup>-3</sup>                                |          |

Table S2. Atomic coordinates (x 10<sup>4</sup>) and equivalent isotropic displacement parameters (Å<sup>2</sup> × 10<sup>3</sup>) for vL170SM\_0m. U(eq) is defined as one third of the trace of the orthogonalized U<sub>ij</sub> tensor.

|        | x       | y        | z       | U(eq) |
|--------|---------|----------|---------|-------|
| Mg(1)  | 3229(1) | 265(1)   | 1854(1) | 15(1) |
| C(1)   | 3045(1) | 2297(2)  | 245(1)  | 24(1) |
| O(1)   | 3386(1) | 1836(1)  | 1049(1) | 19(1) |
| C(2)   | 3700(1) | 2822(2)  | 1569(1) | 21(1) |
| C(3)   | 4237(1) | 2219(2)  | 2109(1) | 21(1) |
| O(2)   | 3967(1) | 1138(1)  | 2571(1) | 20(1) |
| C(4)   | 4383(1) | 667(2)   | 3296(1) | 24(1) |
| C(5)   | 3035(1) | -1708(2) | 3474(1) | 25(1) |
| O(3)   | 3333(1) | -1371(1) | 2607(1) | 19(1) |
| C(6)   | 3458(1) | -2444(2) | 2022(1) | 22(1) |
| C(7)   | 3947(1) | -2042(2) | 1313(1) | 23(1) |
| O(4)   | 3722(1) | -878(1)  | 917(1)  | 21(1) |
| C(8)   | 4046(1) | -570(2)  | 62(1)   | 28(1) |
| C(9)   | 2215(1) | -794(2)  | 374(1)  | 25(1) |
| O(5)   | 2351(1) | -216(1)  | 1257(1) | 19(1) |
| C(10)  | 1794(1) | 415(2)   | 1637(1) | 23(1) |
| C(11)  | 1911(1) | 627(2)   | 2653(1) | 24(1) |
| O(6)   | 2567(1) | 1053(1)  | 2766(1) | 18(1) |
| C(12)  | 2647(1) | 1759(2)  | 3610(1) | 28(1) |
| C(1A)  | 898(1)  | 6609(2)  | 1744(1) | 20(1) |
| B(2A)  | 695(1)  | 5183(2)  | 1572(1) | 22(1) |
| B(3A)  | 1303(1) | 6036(2)  | 893(1)  | 22(1) |
| B(4A)  | 1651(1) | 6650(2)  | 1972(1) | 18(1) |
| B(5A)  | 1044(1) | 5802(2)  | 2656(1) | 19(1) |
| B(6A)  | 1183(1) | 4197(2)  | 2310(1) | 20(1) |
| B(7A)  | 1366(1) | 4361(2)  | 1060(1) | 24(1) |
| B(8A)  | 2049(1) | 5399(2)  | 1344(1) | 21(1) |
| B(9A)  | 1865(1) | 5240(2)  | 2592(1) | 20(1) |
| B(10A) | 1934(1) | 3992(2)  | 1870(2) | 24(1) |
| C(1B)  | 4900(1) | 5639(2)  | 5308(2) | 35(1) |
| B(2B)  | 5168(1) | 6744(2)  | 4669(1) | 20(1) |
| B(3B)  | 5497(1) | 5147(2)  | 4701(2) | 35(1) |
| B(4B)  | 4677(1) | 4507(2)  | 4657(2) | 36(1) |
| B(5B)  | 4348(1) | 6097(2)  | 4618(1) | 23(1) |
| B(6B)  | 4728(1) | 6742(2)  | 3598(1) | 18(1) |
| B(7B)  | 5537(1) | 6071(2)  | 3648(2) | 25(1) |
| B(8B)  | 5192(1) | 4490(2)  | 3635(2) | 37(1) |
| B(9B)  | 4376(1) | 5156(2)  | 3580(2) | 26(1) |
| B(10B) | 4978(1) | 5619(2)  | 2856(2) | 33(1) |

Table S3. Bond lengths [Å] and angles [°] for vL170SM\_0m.

|            |            |
|------------|------------|
| Mg(1)-O(1) | 2.0645(12) |
| Mg(1)-O(3) | 2.0657(12) |
| Mg(1)-O(2) | 2.0660(12) |
| Mg(1)-O(6) | 2.0755(12) |
| Mg(1)-O(5) | 2.0772(11) |
| Mg(1)-O(4) | 2.0854(13) |
| C(1)-O(1)  | 1.4409(19) |
| C(1)-H(1C) | 0.9800     |
| C(1)-H(1D) | 0.9800     |
| C(1)-H(1E) | 0.9800     |

|              |            |
|--------------|------------|
| O(1)-C(2)    | 1.4461(19) |
| C(2)-C(3)    | 1.502(2)   |
| C(2)-H(2C)   | 0.9900     |
| C(2)-H(2D)   | 0.9900     |
| C(3)-O(2)    | 1.4449(19) |
| C(3)-H(3C)   | 0.9900     |
| C(3)-H(3D)   | 0.9900     |
| O(2)-C(4)    | 1.444(2)   |
| C(4)-H(4C)   | 0.9800     |
| C(4)-H(4D)   | 0.9800     |
| C(4)-H(4E)   | 0.9800     |
| C(5)-O(3)    | 1.437(2)   |
| C(5)-H(5C)   | 0.9800     |
| C(5)-H(5D)   | 0.9800     |
| C(5)-H(5E)   | 0.9800     |
| O(3)-C(6)    | 1.444(2)   |
| C(6)-C(7)    | 1.501(2)   |
| C(6)-H(6C)   | 0.9900     |
| C(6)-H(6D)   | 0.9900     |
| C(7)-O(4)    | 1.444(2)   |
| C(7)-H(7C)   | 0.9900     |
| C(7)-H(7D)   | 0.9900     |
| O(4)-C(8)    | 1.439(2)   |
| C(8)-H(8C)   | 0.9800     |
| C(8)-H(8D)   | 0.9800     |
| C(8)-H(8E)   | 0.9800     |
| C(9)-O(5)    | 1.438(2)   |
| C(9)-H(9C)   | 0.9800     |
| C(9)-H(9D)   | 0.9800     |
| C(9)-H(9E)   | 0.9800     |
| O(5)-C(10)   | 1.444(2)   |
| C(10)-C(11)  | 1.499(2)   |
| C(10)-H(10C) | 0.9900     |
| C(10)-H(10D) | 0.9900     |
| C(11)-O(6)   | 1.4412(19) |
| C(11)-H(11A) | 0.9900     |
| C(11)-H(11B) | 0.9900     |
| O(6)-C(12)   | 1.439(2)   |
| C(12)-H(12A) | 0.9800     |
| C(12)-H(12B) | 0.9800     |
| C(12)-H(12C) | 0.9800     |
| C(1A)-B(4A)  | 1.596(2)   |
| C(1A)-B(5A)  | 1.597(2)   |
| C(1A)-B(2A)  | 1.599(2)   |
| C(1A)-B(3A)  | 1.604(3)   |
| C(1A)-H(1A)  | 0.96(2)    |
| B(2A)-B(7A)  | 1.802(3)   |
| B(2A)-B(6A)  | 1.806(3)   |
| B(2A)-B(3A)  | 1.835(3)   |
| B(2A)-B(5A)  | 1.840(3)   |
| B(2A)-H(2A)  | 1.1200     |
| B(3A)-B(8A)  | 1.809(3)   |
| B(3A)-B(7A)  | 1.810(3)   |
| B(3A)-B(4A)  | 1.832(3)   |
| B(3A)-H(3A)  | 1.1200     |
| B(4A)-B(9A)  | 1.805(3)   |



B(4A)-B(8A) 1.811(3)  
B(4A)-B(5A) 1.836(2)  
B(4A)-H(4A) 1.1200  
B(5A)-B(9A) 1.808(2)  
B(5A)-B(6A) 1.808(2)  
B(5A)-H(5A) 1.1200  
B(6A)-B(10A) 1.694(3)  
B(6A)-B(9A) 1.844(3)  
B(6A)-B(7A) 1.845(3)  
B(6A)-H(6A) 1.1200  
B(7A)-B(10A) 1.701(3)  
B(7A)-B(8A) 1.842(3)  
B(7A)-H(7A) 1.1200  
B(8A)-B(10A) 1.698(3)  
B(8A)-B(9A) 1.842(3)  
B(8A)-H(8A) 1.1200  
B(9A)-B(10A) 1.695(3)  
B(9A)-H(9A) 1.1200  
B(10A)-H(10A) 1.1200  
C(1B)-B(5B) 1.592(3)  
C(1B)-B(2B) 1.596(3)  
C(1B)-B(4B) 1.597(3)  
C(1B)-B(3B) 1.602(4)  
C(1B)-H(1B) 0.99(3)  
B(2B)-B(6B) 1.788(3)  
B(2B)-B(7B) 1.805(3)  
B(2B)-B(5B) 1.837(3)  
B(2B)-B(3B) 1.837(3)  
B(2B)-H(2B) 1.1200  
B(3B)-B(8B) 1.800(4)  
B(3B)-B(7B) 1.809(3)  
B(3B)-B(4B) 1.832(3)  
B(3B)-H(3B) 1.1200  
B(4B)-B(9B) 1.807(3)  
B(4B)-B(8B) 1.815(4)  
B(4B)-B(5B) 1.831(3)  
B(4B)-H(4B) 1.1200  
B(5B)-B(9B) 1.799(3)  
B(5B)-B(6B) 1.801(3)  
B(5B)-H(5B) 1.1200  
B(6B)-B(10B) 1.687(3)  
B(6B)-B(7B) 1.826(3)  
B(6B)-B(9B) 1.844(3)  
B(6B)-H(6B) 1.1200  
B(7B)-B(10B) 1.695(3)  
B(7B)-B(8B) 1.835(3)  
B(7B)-H(7B) 1.1200  
B(8B)-B(10B) 1.704(4)  
B(8B)-B(9B) 1.835(3)  
B(8B)-H(8B) 1.1200  
B(9B)-B(10B) 1.699(3)  
B(9B)-H(9B) 1.1200  
B(10B)-H(10B) 1.1200

O(1)-Mg(1)-O(3) 164.69(5)  
O(1)-Mg(1)-O(2) 78.25(5)

O(3)-Mg(1)-O(2) 92.49(5)  
O(1)-Mg(1)-O(6) 97.39(5)  
O(3)-Mg(1)-O(6) 94.67(5)  
O(2)-Mg(1)-O(6) 89.56(5)  
O(1)-Mg(1)-O(5) 96.15(5)  
O(3)-Mg(1)-O(5) 95.65(5)  
O(2)-Mg(1)-O(5) 165.11(5)  
O(6)-Mg(1)-O(5) 77.39(5)  
O(1)-Mg(1)-O(4) 92.08(5)  
O(3)-Mg(1)-O(4) 78.00(5)  
O(2)-Mg(1)-O(4) 102.91(5)  
O(6)-Mg(1)-O(4) 165.69(5)  
O(5)-Mg(1)-O(4) 90.98(5)  
O(1)-C(1)-H(1C) 109.5  
O(1)-C(1)-H(1D) 109.5  
H(1C)-C(1)-H(1D) 109.5  
O(1)-C(1)-H(1E) 109.5  
H(1C)-C(1)-H(1E) 109.5  
H(1D)-C(1)-H(1E) 109.5  
C(1)-O(1)-C(2) 112.78(12)  
C(1)-O(1)-Mg(1) 130.56(10)  
C(2)-O(1)-Mg(1) 111.85(9)  
O(1)-C(2)-C(3) 106.82(13)  
O(1)-C(2)-H(2C) 110.4  
C(3)-C(2)-H(2C) 110.4  
O(1)-C(2)-H(2D) 110.4  
C(3)-C(2)-H(2D) 110.4  
H(2C)-C(2)-H(2D) 108.6  
O(2)-C(3)-C(2) 106.96(12)  
O(2)-C(3)-H(3C) 110.3  
C(2)-C(3)-H(3C) 110.3  
O(2)-C(3)-H(3D) 110.3  
C(2)-C(3)-H(3D) 110.3  
H(3C)-C(3)-H(3D) 108.6  
C(4)-O(2)-C(3) 112.16(12)  
C(4)-O(2)-Mg(1) 130.22(10)  
C(3)-O(2)-Mg(1) 114.76(9)  
O(2)-C(4)-H(4C) 109.5  
O(2)-C(4)-H(4D) 109.5  
H(4C)-C(4)-H(4D) 109.5  
O(2)-C(4)-H(4E) 109.5  
H(4C)-C(4)-H(4E) 109.5  
H(4D)-C(4)-H(4E) 109.5  
O(3)-C(5)-H(5C) 109.5  
O(3)-C(5)-H(5D) 109.5  
H(5C)-C(5)-H(5D) 109.5  
O(3)-C(5)-H(5E) 109.5  
H(5C)-C(5)-H(5E) 109.5  
H(5D)-C(5)-H(5E) 109.5  
C(5)-O(3)-C(6) 112.54(12)  
C(5)-O(3)-Mg(1) 128.41(10)  
C(6)-O(3)-Mg(1) 112.67(9)  
O(3)-C(6)-C(7) 106.85(13)  
O(3)-C(6)-H(6C) 110.4  
C(7)-C(6)-H(6C) 110.4  
O(3)-C(6)-H(6D) 110.4

|                     |            |
|---------------------|------------|
| C(7)-C(6)-H(6D)     | 110.4      |
| H(6C)-C(6)-H(6D)    | 108.6      |
| O(4)-C(7)-C(6)      | 107.19(13) |
| O(4)-C(7)-H(7C)     | 110.3      |
| C(6)-C(7)-H(7C)     | 110.3      |
| O(4)-C(7)-H(7D)     | 110.3      |
| C(6)-C(7)-H(7D)     | 110.3      |
| H(7C)-C(7)-H(7D)    | 108.5      |
| C(8)-O(4)-C(7)      | 112.43(13) |
| C(8)-O(4)-Mg(1)     | 130.31(11) |
| C(7)-O(4)-Mg(1)     | 114.06(10) |
| O(4)-C(8)-H(8C)     | 109.5      |
| O(4)-C(8)-H(8D)     | 109.5      |
| H(8C)-C(8)-H(8D)    | 109.5      |
| O(4)-C(8)-H(8E)     | 109.5      |
| H(8C)-C(8)-H(8E)    | 109.5      |
| H(8D)-C(8)-H(8E)    | 109.5      |
| O(5)-C(9)-H(9C)     | 109.5      |
| O(5)-C(9)-H(9D)     | 109.5      |
| H(9C)-C(9)-H(9D)    | 109.5      |
| O(5)-C(9)-H(9E)     | 109.5      |
| H(9C)-C(9)-H(9E)    | 109.5      |
| H(9D)-C(9)-H(9E)    | 109.5      |
| C(9)-O(5)-C(10)     | 112.14(12) |
| C(9)-O(5)-Mg(1)     | 130.01(10) |
| C(10)-O(5)-Mg(1)    | 115.34(9)  |
| O(5)-C(10)-C(11)    | 108.07(13) |
| O(5)-C(10)-H(10C)   | 110.1      |
| C(11)-C(10)-H(10C)  | 110.1      |
| O(5)-C(10)-H(10D)   | 110.1      |
| C(11)-C(10)-H(10D)  | 110.1      |
| H(10C)-C(10)-H(10D) | 108.4      |
| O(6)-C(11)-C(10)    | 108.01(13) |
| O(6)-C(11)-H(11A)   | 110.1      |
| C(10)-C(11)-H(11A)  | 110.1      |
| O(6)-C(11)-H(11B)   | 110.1      |
| C(10)-C(11)-H(11B)  | 110.1      |
| H(11A)-C(11)-H(11B) | 108.4      |
| C(12)-O(6)-C(11)    | 111.66(13) |
| C(12)-O(6)-Mg(1)    | 131.91(10) |
| C(11)-O(6)-Mg(1)    | 115.16(10) |
| O(6)-C(12)-H(12A)   | 109.5      |
| O(6)-C(12)-H(12B)   | 109.5      |
| H(12A)-C(12)-H(12B) | 109.5      |
| O(6)-C(12)-H(12C)   | 109.5      |
| H(12A)-C(12)-H(12C) | 109.5      |
| H(12B)-C(12)-H(12C) | 109.5      |
| B(4A)-C(1A)-B(5A)   | 70.20(11)  |
| B(4A)-C(1A)-B(2A)   | 108.37(13) |
| B(5A)-C(1A)-B(2A)   | 70.30(11)  |
| B(4A)-C(1A)-B(3A)   | 69.82(11)  |
| B(5A)-C(1A)-B(3A)   | 108.68(13) |
| B(2A)-C(1A)-B(3A)   | 69.90(12)  |
| B(4A)-C(1A)-H(1A)   | 122.6(12)  |
| B(5A)-C(1A)-H(1A)   | 125.3(13)  |
| B(2A)-C(1A)-H(1A)   | 129.1(12)  |

|                   |            |
|-------------------|------------|
| B(3A)-C(1A)-H(1A) | 125.9(13)  |
| C(1A)-B(2A)-B(7A) | 108.92(13) |
| C(1A)-B(2A)-B(6A) | 108.49(13) |
| B(7A)-B(2A)-B(6A) | 61.52(11)  |
| C(1A)-B(2A)-B(3A) | 55.19(10)  |
| B(7A)-B(2A)-B(3A) | 59.67(11)  |
| B(6A)-B(2A)-B(3A) | 102.55(12) |
| C(1A)-B(2A)-B(5A) | 54.81(10)  |
| B(7A)-B(2A)-B(5A) | 102.55(12) |
| B(6A)-B(2A)-B(5A) | 59.44(10)  |
| B(3A)-B(2A)-B(5A) | 90.12(11)  |
| C(1A)-B(2A)-H(2A) | 121.9      |
| B(7A)-B(2A)-H(2A) | 120.4      |
| B(6A)-B(2A)-H(2A) | 120.6      |
| B(3A)-B(2A)-H(2A) | 130.7      |
| B(5A)-B(2A)-H(2A) | 130.9      |
| C(1A)-B(3A)-B(8A) | 108.54(13) |
| C(1A)-B(3A)-B(7A) | 108.31(13) |
| B(8A)-B(3A)-B(7A) | 61.21(11)  |
| C(1A)-B(3A)-B(4A) | 54.87(10)  |
| B(8A)-B(3A)-B(4A) | 59.67(10)  |
| B(7A)-B(3A)-B(4A) | 102.31(13) |
| C(1A)-B(3A)-B(2A) | 54.91(10)  |
| B(8A)-B(3A)-B(2A) | 102.11(13) |
| B(7A)-B(3A)-B(2A) | 59.27(10)  |
| B(4A)-B(3A)-B(2A) | 89.92(12)  |
| C(1A)-B(3A)-H(3A) | 122.0      |
| B(8A)-B(3A)-H(3A) | 120.7      |
| B(7A)-B(3A)-H(3A) | 120.8      |
| B(4A)-B(3A)-H(3A) | 130.8      |
| B(2A)-B(3A)-H(3A) | 131.0      |
| C(1A)-B(4A)-B(9A) | 108.58(12) |
| C(1A)-B(4A)-B(8A) | 108.80(13) |
| B(9A)-B(4A)-B(8A) | 61.23(10)  |
| C(1A)-B(4A)-B(3A) | 55.31(10)  |
| B(9A)-B(4A)-B(3A) | 102.46(12) |
| B(8A)-B(4A)-B(3A) | 59.54(10)  |
| C(1A)-B(4A)-B(5A) | 54.93(10)  |
| B(9A)-B(4A)-B(5A) | 59.52(10)  |
| B(8A)-B(4A)-B(5A) | 102.40(12) |
| B(3A)-B(4A)-B(5A) | 90.35(11)  |
| C(1A)-B(4A)-H(4A) | 121.8      |
| B(9A)-B(4A)-H(4A) | 120.7      |
| B(8A)-B(4A)-H(4A) | 120.6      |
| B(3A)-B(4A)-H(4A) | 130.6      |
| B(5A)-B(4A)-H(4A) | 130.8      |
| C(1A)-B(5A)-B(9A) | 108.41(13) |
| C(1A)-B(5A)-B(6A) | 108.47(14) |
| B(9A)-B(5A)-B(6A) | 61.35(10)  |
| C(1A)-B(5A)-B(4A) | 54.87(10)  |
| B(9A)-B(5A)-B(4A) | 59.39(10)  |
| B(6A)-B(5A)-B(4A) | 102.19(12) |
| C(1A)-B(5A)-B(2A) | 54.89(10)  |
| B(9A)-B(5A)-B(2A) | 101.98(12) |
| B(6A)-B(5A)-B(2A) | 59.33(11)  |
| B(4A)-B(5A)-B(2A) | 89.62(11)  |

|                    |            |
|--------------------|------------|
| C(1A)-B(5A)-H(5A)  | 122.0      |
| B(9A)-B(5A)-H(5A)  | 120.8      |
| B(6A)-B(5A)-H(5A)  | 120.7      |
| B(4A)-B(5A)-H(5A)  | 131.0      |
| B(2A)-B(5A)-H(5A)  | 131.1      |
| B(10A)-B(6A)-B(2A) | 111.70(14) |
| B(10A)-B(6A)-B(5A) | 111.82(13) |
| B(2A)-B(6A)-B(5A)  | 61.23(10)  |
| B(10A)-B(6A)-B(9A) | 57.04(10)  |
| B(2A)-B(6A)-B(9A)  | 101.89(12) |
| B(5A)-B(6A)-B(9A)  | 59.32(10)  |
| B(10A)-B(6A)-B(7A) | 57.24(11)  |
| B(2A)-B(6A)-B(7A)  | 59.15(11)  |
| B(5A)-B(6A)-B(7A)  | 102.14(12) |
| B(9A)-B(6A)-B(7A)  | 89.91(12)  |
| B(10A)-B(6A)-H(6A) | 118.6      |
| B(2A)-B(6A)-H(6A)  | 120.4      |
| B(5A)-B(6A)-H(6A)  | 120.2      |
| B(9A)-B(6A)-H(6A)  | 131.3      |
| B(7A)-B(6A)-H(6A)  | 131.1      |
| B(10A)-B(7A)-B(2A) | 111.56(14) |
| B(10A)-B(7A)-B(3A) | 111.69(13) |
| B(2A)-B(7A)-B(3A)  | 61.06(11)  |
| B(10A)-B(7A)-B(8A) | 57.11(11)  |
| B(2A)-B(7A)-B(8A)  | 102.07(12) |
| B(3A)-B(7A)-B(8A)  | 59.36(10)  |
| B(10A)-B(7A)-B(6A) | 56.90(11)  |
| B(2A)-B(7A)-B(6A)  | 59.33(10)  |
| B(3A)-B(7A)-B(6A)  | 101.99(13) |
| B(8A)-B(7A)-B(6A)  | 89.98(12)  |
| B(10A)-B(7A)-H(7A) | 118.8      |
| B(2A)-B(7A)-H(7A)  | 120.3      |
| B(3A)-B(7A)-H(7A)  | 120.3      |
| B(8A)-B(7A)-H(7A)  | 131.1      |
| B(6A)-B(7A)-H(7A)  | 131.2      |
| B(10A)-B(8A)-B(3A) | 111.86(13) |
| B(10A)-B(8A)-B(4A) | 111.52(13) |
| B(3A)-B(8A)-B(4A)  | 60.80(10)  |
| B(10A)-B(8A)-B(9A) | 57.04(11)  |
| B(3A)-B(8A)-B(9A)  | 101.93(12) |
| B(4A)-B(8A)-B(9A)  | 59.23(10)  |
| B(10A)-B(8A)-B(7A) | 57.24(11)  |
| B(3A)-B(8A)-B(7A)  | 59.42(11)  |
| B(4A)-B(8A)-B(7A)  | 101.84(12) |
| B(9A)-B(8A)-B(7A)  | 90.09(12)  |
| B(10A)-B(8A)-H(8A) | 118.7      |
| B(3A)-B(8A)-H(8A)  | 120.3      |
| B(4A)-B(8A)-H(8A)  | 120.6      |
| B(9A)-B(8A)-H(8A)  | 131.2      |
| B(7A)-B(8A)-H(8A)  | 131.0      |
| B(10A)-B(9A)-B(4A) | 111.98(13) |
| B(10A)-B(9A)-B(5A) | 111.79(13) |
| B(4A)-B(9A)-B(5A)  | 61.09(10)  |
| B(10A)-B(9A)-B(8A) | 57.22(11)  |
| B(4A)-B(9A)-B(8A)  | 59.54(10)  |
| B(5A)-B(9A)-B(8A)  | 102.32(12) |

|                     |            |
|---------------------|------------|
| B(10A)-B(9A)-B(6A)  | 57.01(10)  |
| B(4A)-B(9A)-B(6A)   | 101.97(12) |
| B(5A)-B(9A)-B(6A)   | 59.33(10)  |
| B(8A)-B(9A)-B(6A)   | 90.02(12)  |
| B(10A)-B(9A)-H(9A)  | 118.6      |
| B(4A)-B(9A)-H(9A)   | 120.2      |
| B(5A)-B(9A)-H(9A)   | 120.2      |
| B(8A)-B(9A)-H(9A)   | 130.9      |
| B(6A)-B(9A)-H(9A)   | 131.3      |
| B(6A)-B(10A)-B(9A)  | 65.95(11)  |
| B(6A)-B(10A)-B(8A)  | 100.44(13) |
| B(9A)-B(10A)-B(8A)  | 65.75(11)  |
| B(6A)-B(10A)-B(7A)  | 65.85(12)  |
| B(9A)-B(10A)-B(7A)  | 100.32(13) |
| B(8A)-B(10A)-B(7A)  | 65.65(12)  |
| B(6A)-B(10A)-H(10A) | 129.7      |
| B(9A)-B(10A)-H(10A) | 129.8      |
| B(8A)-B(10A)-H(10A) | 129.9      |
| B(7A)-B(10A)-H(10A) | 129.9      |
| B(5B)-C(1B)-B(2B)   | 70.37(12)  |
| B(5B)-C(1B)-B(4B)   | 70.08(14)  |
| B(2B)-C(1B)-B(4B)   | 108.84(17) |
| B(5B)-C(1B)-B(3B)   | 108.44(17) |
| B(2B)-C(1B)-B(3B)   | 70.13(14)  |
| B(4B)-C(1B)-B(3B)   | 69.88(15)  |
| B(5B)-C(1B)-H(1B)   | 125.4(15)  |
| B(2B)-C(1B)-H(1B)   | 126.7(14)  |
| B(4B)-C(1B)-H(1B)   | 124.4(14)  |
| B(3B)-C(1B)-H(1B)   | 126.1(15)  |
| C(1B)-B(2B)-B(6B)   | 108.48(14) |
| C(1B)-B(2B)-B(7B)   | 108.74(15) |
| B(6B)-B(2B)-B(7B)   | 61.07(11)  |
| C(1B)-B(2B)-B(5B)   | 54.71(11)  |
| B(6B)-B(2B)-B(5B)   | 59.56(10)  |
| B(7B)-B(2B)-B(5B)   | 102.15(13) |
| C(1B)-B(2B)-B(3B)   | 55.09(14)  |
| B(6B)-B(2B)-B(3B)   | 102.10(13) |
| B(7B)-B(2B)-B(3B)   | 59.56(13)  |
| B(5B)-B(2B)-B(3B)   | 89.70(12)  |
| C(1B)-B(2B)-H(2B)   | 121.9      |
| B(6B)-B(2B)-H(2B)   | 120.8      |
| B(7B)-B(2B)-H(2B)   | 120.6      |
| B(5B)-B(2B)-H(2B)   | 131.1      |
| B(3B)-B(2B)-H(2B)   | 130.9      |
| C(1B)-B(3B)-B(8B)   | 108.67(16) |
| C(1B)-B(3B)-B(7B)   | 108.24(15) |
| B(8B)-B(3B)-B(7B)   | 61.09(14)  |
| C(1B)-B(3B)-B(4B)   | 54.92(14)  |
| B(8B)-B(3B)-B(4B)   | 59.96(14)  |
| B(7B)-B(3B)-B(4B)   | 102.58(15) |
| C(1B)-B(3B)-B(2B)   | 54.77(12)  |
| B(8B)-B(3B)-B(2B)   | 102.13(14) |
| B(7B)-B(3B)-B(2B)   | 59.32(11)  |
| B(4B)-B(3B)-B(2B)   | 90.09(13)  |
| C(1B)-B(3B)-H(3B)   | 122.1      |
| B(8B)-B(3B)-H(3B)   | 120.6      |

|                    |            |
|--------------------|------------|
| B(7B)-B(3B)-H(3B)  | 120.8      |
| B(4B)-B(3B)-H(3B)  | 130.5      |
| B(2B)-B(3B)-H(3B)  | 131.0      |
| C(1B)-B(4B)-B(9B)  | 108.14(14) |
| C(1B)-B(4B)-B(8B)  | 108.20(16) |
| B(9B)-B(4B)-B(8B)  | 60.89(13)  |
| C(1B)-B(4B)-B(5B)  | 54.83(12)  |
| B(9B)-B(4B)-B(5B)  | 59.27(11)  |
| B(8B)-B(4B)-B(5B)  | 101.75(15) |
| C(1B)-B(4B)-B(3B)  | 55.20(14)  |
| B(9B)-B(4B)-B(3B)  | 101.92(15) |
| B(8B)-B(4B)-B(3B)  | 59.16(14)  |
| B(5B)-B(4B)-B(3B)  | 90.06(13)  |
| C(1B)-B(4B)-H(4B)  | 122.0      |
| B(9B)-B(4B)-H(4B)  | 121.0      |
| B(8B)-B(4B)-H(4B)  | 121.1      |
| B(5B)-B(4B)-H(4B)  | 131.0      |
| B(3B)-B(4B)-H(4B)  | 130.8      |
| C(1B)-B(5B)-B(9B)  | 108.76(16) |
| C(1B)-B(5B)-B(6B)  | 108.07(15) |
| B(9B)-B(5B)-B(6B)  | 61.62(11)  |
| C(1B)-B(5B)-B(4B)  | 55.09(13)  |
| B(9B)-B(5B)-B(4B)  | 59.71(13)  |
| B(6B)-B(5B)-B(4B)  | 102.51(14) |
| C(1B)-B(5B)-B(2B)  | 54.92(11)  |
| B(9B)-B(5B)-B(2B)  | 102.29(13) |
| B(6B)-B(5B)-B(2B)  | 58.89(10)  |
| B(4B)-B(5B)-B(2B)  | 90.15(13)  |
| C(1B)-B(5B)-H(5B)  | 122.0      |
| B(9B)-B(5B)-H(5B)  | 120.4      |
| B(6B)-B(5B)-H(5B)  | 120.9      |
| B(4B)-B(5B)-H(5B)  | 130.6      |
| B(2B)-B(5B)-H(5B)  | 131.1      |
| B(10B)-B(6B)-B(2B) | 112.86(15) |
| B(10B)-B(6B)-B(5B) | 112.17(14) |
| B(2B)-B(6B)-B(5B)  | 61.55(11)  |
| B(10B)-B(6B)-B(7B) | 57.53(11)  |
| B(2B)-B(6B)-B(7B)  | 59.90(11)  |
| B(5B)-B(6B)-B(7B)  | 102.72(13) |
| B(10B)-B(6B)-B(9B) | 57.31(12)  |
| B(2B)-B(6B)-B(9B)  | 102.40(13) |
| B(5B)-B(6B)-B(9B)  | 59.13(11)  |
| B(7B)-B(6B)-B(9B)  | 90.19(11)  |
| B(10B)-B(6B)-H(6B) | 118.1      |
| B(2B)-B(6B)-H(6B)  | 119.6      |
| B(5B)-B(6B)-H(6B)  | 120.0      |
| B(7B)-B(6B)-H(6B)  | 130.8      |
| B(9B)-B(6B)-H(6B)  | 131.3      |
| B(10B)-B(7B)-B(2B) | 111.69(14) |
| B(10B)-B(7B)-B(3B) | 112.02(15) |
| B(2B)-B(7B)-B(3B)  | 61.11(12)  |
| B(10B)-B(7B)-B(6B) | 57.13(11)  |
| B(2B)-B(7B)-B(6B)  | 59.03(10)  |
| B(3B)-B(7B)-B(6B)  | 101.76(14) |
| B(10B)-B(7B)-B(8B) | 57.58(14)  |
| B(2B)-B(7B)-B(8B)  | 102.07(15) |

|                     |            |
|---------------------|------------|
| B(3B)-B(7B)-B(8B)   | 59.22(14)  |
| B(6B)-B(7B)-B(8B)   | 90.10(12)  |
| B(10B)-B(7B)-H(7B)  | 118.4      |
| B(2B)-B(7B)-H(7B)   | 120.4      |
| B(3B)-B(7B)-H(7B)   | 120.3      |
| B(6B)-B(7B)-H(7B)   | 131.3      |
| B(8B)-B(7B)-H(7B)   | 130.9      |
| B(10B)-B(8B)-B(3B)  | 112.01(14) |
| B(10B)-B(8B)-B(4B)  | 111.86(15) |
| B(3B)-B(8B)-B(4B)   | 60.88(14)  |
| B(10B)-B(8B)-B(7B)  | 57.10(12)  |
| B(3B)-B(8B)-B(7B)   | 59.69(12)  |
| B(4B)-B(8B)-B(7B)   | 102.23(15) |
| B(10B)-B(8B)-B(9B)  | 57.22(13)  |
| B(3B)-B(8B)-B(9B)   | 102.04(16) |
| B(4B)-B(8B)-B(9B)   | 59.33(13)  |
| B(7B)-B(8B)-B(9B)   | 90.18(13)  |
| B(10B)-B(8B)-H(8B)  | 118.5      |
| B(3B)-B(8B)-H(8B)   | 120.2      |
| B(4B)-B(8B)-H(8B)   | 120.3      |
| B(7B)-B(8B)-H(8B)   | 130.9      |
| B(9B)-B(8B)-H(8B)   | 131.1      |
| B(10B)-B(9B)-B(5B)  | 111.73(14) |
| B(10B)-B(9B)-B(4B)  | 112.54(16) |
| B(5B)-B(9B)-B(4B)   | 61.02(13)  |
| B(10B)-B(9B)-B(8B)  | 57.50(14)  |
| B(5B)-B(9B)-B(8B)   | 102.20(15) |
| B(4B)-B(9B)-B(8B)   | 59.79(14)  |
| B(10B)-B(9B)-B(6B)  | 56.71(11)  |
| B(5B)-B(9B)-B(6B)   | 59.25(10)  |
| B(4B)-B(9B)-B(6B)   | 101.77(13) |
| B(8B)-B(9B)-B(6B)   | 89.52(12)  |
| B(10B)-B(9B)-H(9B)  | 118.4      |
| B(5B)-B(9B)-H(9B)   | 120.3      |
| B(4B)-B(9B)-H(9B)   | 120.0      |
| B(8B)-B(9B)-H(9B)   | 131.0      |
| B(6B)-B(9B)-H(9B)   | 131.7      |
| B(6B)-B(10B)-B(7B)  | 65.33(12)  |
| B(6B)-B(10B)-B(9B)  | 65.98(12)  |
| B(7B)-B(10B)-B(9B)  | 99.96(16)  |
| B(6B)-B(10B)-B(8B)  | 99.60(16)  |
| B(7B)-B(10B)-B(8B)  | 65.32(14)  |
| B(9B)-B(10B)-B(8B)  | 65.27(14)  |
| B(6B)-B(10B)-H(10B) | 130.0      |
| B(7B)-B(10B)-H(10B) | 130.2      |
| B(9B)-B(10B)-H(10B) | 129.9      |
| B(8B)-B(10B)-H(10B) | 130.4      |

---

Symmetry transformations used to generate equivalent atoms:

Table S4. Anisotropic displacement parameters ( $\text{\AA}^2 \times 10^3$ ) for vL170SM\_0m. The anisotropic displacement factor exponent takes the form:  $-2\pi^2 [ h^2 a^{*2} U_{11} + \dots + 2 h k a^* b^* U_{12} ]$

---

|       | U <sub>11</sub> | U <sub>22</sub> | U <sub>33</sub> | U <sub>23</sub> | U <sub>13</sub> | U <sub>12</sub> |
|-------|-----------------|-----------------|-----------------|-----------------|-----------------|-----------------|
| Mg(1) | 14(1)           | 17(1)           | 13(1)           | 0(1)            | -1(1)           | -1(1)           |

---



|        |       |       |       |        |        |        |
|--------|-------|-------|-------|--------|--------|--------|
| C(1)   | 26(1) | 25(1) | 20(1) | 6(1)   | -1(1)  | -1(1)  |
| O(1)   | 22(1) | 18(1) | 17(1) | 1(1)   | -2(1)  | -4(1)  |
| C(2)   | 20(1) | 18(1) | 25(1) | -3(1)  | 2(1)   | -4(1)  |
| C(3)   | 16(1) | 21(1) | 26(1) | -3(1)  | 1(1)   | -5(1)  |
| O(2)   | 15(1) | 25(1) | 19(1) | 0(1)   | -3(1)  | -4(1)  |
| C(4)   | 17(1) | 36(1) | 19(1) | -3(1)  | -5(1)  | 1(1)   |
| C(5)   | 24(1) | 32(1) | 20(1) | 9(1)   | 0(1)   | -1(1)  |
| O(3)   | 20(1) | 20(1) | 18(1) | 3(1)   | 0(1)   | 0(1)   |
| C(6)   | 23(1) | 18(1) | 26(1) | -1(1)  | -6(1)  | 0(1)   |
| C(7)   | 22(1) | 22(1) | 25(1) | -3(1)  | -2(1)  | 5(1)   |
| O(4)   | 23(1) | 22(1) | 17(1) | 0(1)   | 2(1)   | 3(1)   |
| C(8)   | 30(1) | 37(1) | 18(1) | -3(1)  | 6(1)   | 1(1)   |
| C(9)   | 27(1) | 28(1) | 21(1) | -3(1)  | -9(1)  | -6(1)  |
| O(5)   | 16(1) | 21(1) | 20(1) | -2(1)  | -6(1)  | -2(1)  |
| C(10)  | 15(1) | 26(1) | 27(1) | 0(1)   | -6(1)  | 1(1)   |
| C(11)  | 14(1) | 30(1) | 26(1) | 1(1)   | 2(1)   | -2(1)  |
| O(6)   | 14(1) | 24(1) | 17(1) | -2(1)  | 0(1)   | 0(1)   |
| C(12)  | 26(1) | 40(1) | 18(1) | -9(1)  | 1(1)   | 3(1)   |
| C(1A)  | 16(1) | 21(1) | 24(1) | 5(1)   | -1(1)  | 1(1)   |
| B(2A)  | 17(1) | 26(1) | 22(1) | 3(1)   | -2(1)  | -6(1)  |
| B(3A)  | 23(1) | 25(1) | 18(1) | 3(1)   | -2(1)  | -6(1)  |
| B(4A)  | 17(1) | 18(1) | 19(1) | 1(1)   | 0(1)   | -2(1)  |
| B(5A)  | 18(1) | 21(1) | 18(1) | 1(1)   | 3(1)   | 1(1)   |
| B(6A)  | 20(1) | 18(1) | 23(1) | 2(1)   | 2(1)   | -2(1)  |
| B(7A)  | 27(1) | 22(1) | 23(1) | -4(1)  | 3(1)   | -7(1)  |
| B(8A)  | 17(1) | 22(1) | 22(1) | -2(1)  | 4(1)   | -2(1)  |
| B(9A)  | 18(1) | 21(1) | 20(1) | 2(1)   | -2(1)  | 0(1)   |
| B(10A) | 21(1) | 20(1) | 32(1) | 0(1)   | 5(1)   | 2(1)   |
| C(1B)  | 45(1) | 33(1) | 28(1) | 15(1)  | -9(1)  | -10(1) |
| B(2B)  | 24(1) | 18(1) | 18(1) | 2(1)   | -5(1)  | -3(1)  |
| B(3B)  | 27(1) | 18(1) | 62(2) | 10(1)  | -19(1) | -3(1)  |
| B(4B)  | 29(1) | 19(1) | 59(2) | 15(1)  | -10(1) | -6(1)  |
| B(5B)  | 25(1) | 21(1) | 23(1) | 3(1)   | 4(1)   | -4(1)  |
| B(6B)  | 17(1) | 20(1) | 16(1) | -2(1)  | 0(1)   | -1(1)  |
| B(7B)  | 18(1) | 19(1) | 38(1) | -6(1)  | 2(1)   | 1(1)   |
| B(8B)  | 21(1) | 20(1) | 70(2) | -15(1) | -3(1)  | 1(1)   |
| B(9B)  | 19(1) | 20(1) | 38(1) | -10(1) | -4(1)  | -1(1)  |
| B(10B) | 31(1) | 38(1) | 30(1) | -18(1) | 4(1)   | -3(1)  |

Table S5. Hydrogen coordinates ( $\times 10^4$ ) and isotropic displacement parameters ( $\text{\AA}^2 \times 10^3$ ) for vL170SM\_0m.

|       | x    | y    | z    | U(eq) |
|-------|------|------|------|-------|
| H(1C) | 3350 | 2703 | -179 | 35    |
| H(1D) | 2718 | 2905 | 442  | 35    |
| H(1E) | 2835 | 1597 | -75  | 35    |
| H(2C) | 3390 | 3228 | 1998 | 25    |
| H(2D) | 3874 | 3465 | 1142 | 25    |
| H(3C) | 4589 | 1961 | 1685 | 26    |
| H(3D) | 4415 | 2813 | 2572 | 26    |
| H(4C) | 4463 | 1330 | 3753 | 36    |
| H(4D) | 4794 | 398  | 3024 | 36    |
| H(4E) | 4176 | -46  | 3603 | 36    |

|        |          |          |          |          |          |    |
|--------|----------|----------|----------|----------|----------|----|
| H(5C)  | 3319     | -2280    | 3816     | 38       |          |    |
| H(5D)  | 2622     | -2123    | 3353     | 38       |          |    |
| H(5E)  | 2961     | -952     | 3846     | 38       |          |    |
| H(6C)  | 3057     | -2722    | 1712     | 27       |          |    |
| H(6D)  | 3629     | -3147    | 2398     | 27       |          |    |
| H(7C)  | 4373     | -1921    | 1610     | 27       |          |    |
| H(7D)  | 3990     | -2686    | 821      | 27       |          |    |
| H(8C)  | 3957     | -1219    | -403     | 42       |          |    |
| H(8D)  | 4512     | -522     | 173      | 42       |          |    |
| H(8E)  | 3890     | 240      | -166     | 42       |          |    |
| H(9C)  | 1901     | -1471    | 462      | 38       |          |    |
| H(9D)  | 2614     | -1136    | 112      | 38       |          |    |
| H(9E)  | 2036     | -167     | -52      | 38       |          |    |
| H(10C) | 1404     | -104     | 1547     | 27       |          |    |
| H(10D) | 1728     | 1226     | 1317     | 27       |          |    |
| H(11A) | 1608     | 1264     | 2896     | 28       |          |    |
| H(11B) | 1844     | -161     | 3003     | 28       |          |    |
| H(12A) | 2371     | 2503     | 3592     | 42       |          |    |
| H(12B) | 3099     | 2018     | 3671     | 42       |          |    |
| H(12C) | 2527     | 1237     | 4144     | 42       |          |    |
| H(1A)  | 636(10)  | 7348(19) |          | 1723(15) | 24       |    |
| H(2A)  | 188      | 4912     | 1394     | 26       |          |    |
| H(3A)  | 1282     | 6448     | 177      | 26       |          |    |
| H(4A)  | 1909     | 7552     | 2115     | 22       |          |    |
| H(5A)  | 817      | 6024     | 3343     | 23       |          |    |
| H(6A)  | 958      | 3411     | 2711     | 24       |          |    |
| H(7A)  | 1288     | 3707     | 462      | 29       |          |    |
| H(8A)  | 2515     | 5572     | 972      | 25       |          |    |
| H(9A)  | 2186     | 5289     | 3217     | 23       |          |    |
| H(10A) | 2262     | 3161     | 1913     | 29       |          |    |
| H(1B)  | 4871(12) |          | 5640(20) |          | 5990(20) | 42 |
| H(2B)  | 5354     | 7641     | 4972     | 24       |          |    |
| H(3B)  | 5946     | 4766     | 5030     | 42       |          |    |
| H(4B)  | 4473     | 3619     | 4949     | 43       |          |    |
| H(5B)  | 3877     | 6476     | 4877     | 27       |          |    |
| H(6B)  | 4552     | 7649     | 3300     | 21       |          |    |
| H(7B)  | 6012     | 6431     | 3390     | 30       |          |    |
| H(8B)  | 5390     | 3585     | 3365     | 45       |          |    |
| H(9B)  | 3921     | 4783     | 3266     | 31       |          |    |
| H(10B) | 4999     | 5620     | 2077     | 39       |          |    |

Table

## 6. Torsion angles [°] for vL170SM\_0m.

|                        |             |
|------------------------|-------------|
| C(1)-O(1)-C(2)-C(3)    | -156.90(13) |
| Mg(1)-O(1)-C(2)-C(3)   | 44.93(14)   |
| O(1)-C(2)-C(3)-O(2)    | -48.81(16)  |
| C(2)-C(3)-O(2)-C(4)    | -164.93(13) |
| C(2)-C(3)-O(2)-Mg(1)   | 32.19(15)   |
| C(5)-O(3)-C(6)-C(7)    | -161.92(13) |
| Mg(1)-O(3)-C(6)-C(7)   | 43.62(14)   |
| O(3)-C(6)-C(7)-O(4)    | -49.19(16)  |
| C(6)-C(7)-O(4)-C(8)    | -163.99(14) |
| C(6)-C(7)-O(4)-Mg(1)   | 34.05(15)   |
| C(9)-O(5)-C(10)-C(11)  | 162.47(14)  |
| Mg(1)-O(5)-C(10)-C(11) | -33.63(15)  |
| O(5)-C(10)-C(11)-O(6)  | 43.16(17)   |

|                         |             |
|-------------------------|-------------|
| C(10)-C(11)-O(6)-C(12)  | 155.88(14)  |
| C(10)-C(11)-O(6)-Mg(1)  | -35.48(16)  |
| B(4A)-C(1A)-B(2A)-B(7A) | -32.11(18)  |
| B(5A)-C(1A)-B(2A)-B(7A) | -92.25(14)  |
| B(3A)-C(1A)-B(2A)-B(7A) | 27.32(13)   |
| B(4A)-C(1A)-B(2A)-B(6A) | 33.24(18)   |
| B(5A)-C(1A)-B(2A)-B(6A) | -26.89(13)  |
| B(3A)-C(1A)-B(2A)-B(6A) | 92.67(14)   |
| B(4A)-C(1A)-B(2A)-B(3A) | -59.43(13)  |
| B(5A)-C(1A)-B(2A)-B(3A) | -119.56(13) |
| B(4A)-C(1A)-B(2A)-B(5A) | 60.13(13)   |
| B(3A)-C(1A)-B(2A)-B(5A) | 119.56(13)  |
| B(4A)-C(1A)-B(3A)-B(8A) | 27.48(12)   |
| B(5A)-C(1A)-B(3A)-B(8A) | -32.18(17)  |
| B(2A)-C(1A)-B(3A)-B(8A) | -92.00(14)  |
| B(4A)-C(1A)-B(3A)-B(7A) | 92.39(14)   |
| B(5A)-C(1A)-B(3A)-B(7A) | 32.74(17)   |
| B(2A)-C(1A)-B(3A)-B(7A) | -27.09(13)  |
| B(5A)-C(1A)-B(3A)-B(4A) | -59.65(13)  |
| B(2A)-C(1A)-B(3A)-B(4A) | -119.48(13) |
| B(4A)-C(1A)-B(3A)-B(2A) | 119.48(13)  |
| B(5A)-C(1A)-B(3A)-B(2A) | 59.82(13)   |
| B(7A)-B(2A)-B(3A)-C(1A) | -149.81(14) |
| B(6A)-B(2A)-B(3A)-C(1A) | -103.94(14) |
| B(5A)-B(2A)-B(3A)-C(1A) | -45.30(11)  |
| C(1A)-B(2A)-B(3A)-B(8A) | 104.28(14)  |
| B(7A)-B(2A)-B(3A)-B(8A) | -45.53(12)  |
| B(6A)-B(2A)-B(3A)-B(8A) | 0.34(15)    |
| B(5A)-B(2A)-B(3A)-B(8A) | 58.98(13)   |
| C(1A)-B(2A)-B(3A)-B(7A) | 149.81(14)  |
| B(6A)-B(2A)-B(3A)-B(7A) | 45.87(12)   |
| B(5A)-B(2A)-B(3A)-B(7A) | 104.51(12)  |
| C(1A)-B(2A)-B(3A)-B(4A) | 45.40(11)   |
| B(7A)-B(2A)-B(3A)-B(4A) | -104.41(13) |
| B(6A)-B(2A)-B(3A)-B(4A) | -58.54(13)  |
| B(5A)-B(2A)-B(3A)-B(4A) | 0.10(12)    |
| B(5A)-C(1A)-B(4A)-B(9A) | 27.14(13)   |
| B(2A)-C(1A)-B(4A)-B(9A) | -33.06(18)  |
| B(3A)-C(1A)-B(4A)-B(9A) | -92.53(14)  |
| B(5A)-C(1A)-B(4A)-B(8A) | 92.19(13)   |
| B(2A)-C(1A)-B(4A)-B(8A) | 31.99(17)   |
| B(3A)-C(1A)-B(4A)-B(8A) | -27.49(12)  |
| B(5A)-C(1A)-B(4A)-B(3A) | 119.67(13)  |
| B(2A)-C(1A)-B(4A)-B(3A) | 59.48(13)   |
| B(2A)-C(1A)-B(4A)-B(5A) | -60.20(13)  |
| B(3A)-C(1A)-B(4A)-B(5A) | -119.67(13) |
| B(8A)-B(3A)-B(4A)-C(1A) | -149.54(13) |
| B(7A)-B(3A)-B(4A)-C(1A) | -103.87(13) |
| B(2A)-B(3A)-B(4A)-C(1A) | -45.43(11)  |
| C(1A)-B(3A)-B(4A)-B(9A) | 104.12(13)  |
| B(8A)-B(3A)-B(4A)-B(9A) | -45.43(11)  |
| B(7A)-B(3A)-B(4A)-B(9A) | 0.25(15)    |
| B(2A)-B(3A)-B(4A)-B(9A) | 58.69(13)   |
| C(1A)-B(3A)-B(4A)-B(8A) | 149.54(13)  |
| B(7A)-B(3A)-B(4A)-B(8A) | 45.68(12)   |
| B(2A)-B(3A)-B(4A)-B(8A) | 104.12(12)  |

|                          |             |
|--------------------------|-------------|
| C(1A)-B(3A)-B(4A)-B(5A)  | 45.33(10)   |
| B(8A)-B(3A)-B(4A)-B(5A)  | -104.22(12) |
| B(7A)-B(3A)-B(4A)-B(5A)  | -58.54(13)  |
| B(2A)-B(3A)-B(4A)-B(5A)  | -0.10(12)   |
| B(4A)-C(1A)-B(5A)-B(9A)  | -27.07(13)  |
| B(2A)-C(1A)-B(5A)-B(9A)  | 91.92(13)   |
| B(3A)-C(1A)-B(5A)-B(9A)  | 32.35(17)   |
| B(4A)-C(1A)-B(5A)-B(6A)  | -92.13(13)  |
| B(2A)-C(1A)-B(5A)-B(6A)  | 26.85(13)   |
| B(3A)-C(1A)-B(5A)-B(6A)  | -32.72(17)  |
| B(2A)-C(1A)-B(5A)-B(4A)  | 118.99(13)  |
| B(3A)-C(1A)-B(5A)-B(4A)  | 59.42(12)   |
| B(4A)-C(1A)-B(5A)-B(2A)  | -118.99(13) |
| B(3A)-C(1A)-B(5A)-B(2A)  | -59.57(13)  |
| B(9A)-B(4A)-B(5A)-C(1A)  | -149.89(14) |
| B(8A)-B(4A)-B(5A)-C(1A)  | -104.41(14) |
| B(3A)-B(4A)-B(5A)-C(1A)  | -45.59(11)  |
| C(1A)-B(4A)-B(5A)-B(9A)  | 149.89(14)  |
| B(8A)-B(4A)-B(5A)-B(9A)  | 45.47(12)   |
| B(3A)-B(4A)-B(5A)-B(9A)  | 104.29(12)  |
| C(1A)-B(4A)-B(5A)-B(6A)  | 104.14(14)  |
| B(9A)-B(4A)-B(5A)-B(6A)  | -45.75(12)  |
| B(8A)-B(4A)-B(5A)-B(6A)  | -0.27(15)   |
| B(3A)-B(4A)-B(5A)-B(6A)  | 58.55(13)   |
| C(1A)-B(4A)-B(5A)-B(2A)  | 45.69(11)   |
| B(9A)-B(4A)-B(5A)-B(2A)  | -104.19(12) |
| B(8A)-B(4A)-B(5A)-B(2A)  | -58.72(13)  |
| B(3A)-B(4A)-B(5A)-B(2A)  | 0.10(12)    |
| B(7A)-B(2A)-B(5A)-C(1A)  | 104.46(14)  |
| B(6A)-B(2A)-B(5A)-C(1A)  | 150.12(14)  |
| B(3A)-B(2A)-B(5A)-C(1A)  | 45.58(11)   |
| C(1A)-B(2A)-B(5A)-B(9A)  | -104.21(13) |
| B(7A)-B(2A)-B(5A)-B(9A)  | 0.25(15)    |
| B(6A)-B(2A)-B(5A)-B(9A)  | 45.92(11)   |
| B(3A)-B(2A)-B(5A)-B(9A)  | -58.63(13)  |
| C(1A)-B(2A)-B(5A)-B(6A)  | -150.12(14) |
| B(7A)-B(2A)-B(5A)-B(6A)  | -45.67(12)  |
| B(3A)-B(2A)-B(5A)-B(6A)  | -104.55(12) |
| C(1A)-B(2A)-B(5A)-B(4A)  | -45.67(10)  |
| B(7A)-B(2A)-B(5A)-B(4A)  | 58.78(13)   |
| B(6A)-B(2A)-B(5A)-B(4A)  | 104.45(12)  |
| B(3A)-B(2A)-B(5A)-B(4A)  | -0.10(12)   |
| C(1A)-B(2A)-B(6A)-B(10A) | -78.34(17)  |
| B(7A)-B(2A)-B(6A)-B(10A) | 23.64(13)   |
| B(3A)-B(2A)-B(6A)-B(10A) | -21.17(17)  |
| B(5A)-B(2A)-B(6A)-B(10A) | -103.76(15) |
| C(1A)-B(2A)-B(6A)-B(5A)  | 25.42(13)   |
| B(7A)-B(2A)-B(6A)-B(5A)  | 127.40(12)  |
| B(3A)-B(2A)-B(6A)-B(5A)  | 82.59(12)   |
| C(1A)-B(2A)-B(6A)-B(9A)  | -19.31(16)  |
| B(7A)-B(2A)-B(6A)-B(9A)  | 82.67(12)   |
| B(3A)-B(2A)-B(6A)-B(9A)  | 37.86(15)   |
| B(5A)-B(2A)-B(6A)-B(9A)  | -44.73(11)  |
| C(1A)-B(2A)-B(6A)-B(7A)  | -101.98(14) |
| B(3A)-B(2A)-B(6A)-B(7A)  | -44.81(12)  |
| B(5A)-B(2A)-B(6A)-B(7A)  | -127.40(12) |

|                          |             |
|--------------------------|-------------|
| C(1A)-B(5A)-B(6A)-B(10A) | 78.12(17)   |
| B(9A)-B(5A)-B(6A)-B(10A) | -23.23(14)  |
| B(4A)-B(5A)-B(6A)-B(10A) | 21.39(18)   |
| B(2A)-B(5A)-B(6A)-B(10A) | 103.57(16)  |
| C(1A)-B(5A)-B(6A)-B(2A)  | -25.44(12)  |
| B(9A)-B(5A)-B(6A)-B(2A)  | -126.80(13) |
| B(4A)-B(5A)-B(6A)-B(2A)  | -82.18(12)  |
| C(1A)-B(5A)-B(6A)-B(9A)  | 101.36(14)  |
| B(4A)-B(5A)-B(6A)-B(9A)  | 44.62(11)   |
| B(2A)-B(5A)-B(6A)-B(9A)  | 126.80(13)  |
| C(1A)-B(5A)-B(6A)-B(7A)  | 18.79(16)   |
| B(9A)-B(5A)-B(6A)-B(7A)  | -82.57(13)  |
| B(4A)-B(5A)-B(6A)-B(7A)  | -37.94(15)  |
| B(2A)-B(5A)-B(6A)-B(7A)  | 44.23(11)   |
| C(1A)-B(2A)-B(7A)-B(10A) | 77.75(17)   |
| B(6A)-B(2A)-B(7A)-B(10A) | -23.52(13)  |
| B(3A)-B(2A)-B(7A)-B(10A) | 103.63(15)  |
| B(5A)-B(2A)-B(7A)-B(10A) | 20.97(16)   |
| C(1A)-B(2A)-B(7A)-B(3A)  | -25.88(13)  |
| B(6A)-B(2A)-B(7A)-B(3A)  | -127.15(13) |
| B(5A)-B(2A)-B(7A)-B(3A)  | -82.66(12)  |
| C(1A)-B(2A)-B(7A)-B(8A)  | 18.58(17)   |
| B(6A)-B(2A)-B(7A)-B(8A)  | -82.69(13)  |
| B(3A)-B(2A)-B(7A)-B(8A)  | 44.46(12)   |
| B(5A)-B(2A)-B(7A)-B(8A)  | -38.20(15)  |
| C(1A)-B(2A)-B(7A)-B(6A)  | 101.27(14)  |
| B(3A)-B(2A)-B(7A)-B(6A)  | 127.15(13)  |
| B(5A)-B(2A)-B(7A)-B(6A)  | 44.49(11)   |
| C(1A)-B(3A)-B(7A)-B(10A) | -77.73(17)  |
| B(8A)-B(3A)-B(7A)-B(10A) | 23.83(13)   |
| B(4A)-B(3A)-B(7A)-B(10A) | -20.97(17)  |
| B(2A)-B(3A)-B(7A)-B(10A) | -103.41(15) |
| C(1A)-B(3A)-B(7A)-B(2A)  | 25.69(12)   |
| B(8A)-B(3A)-B(7A)-B(2A)  | 127.24(13)  |
| B(4A)-B(3A)-B(7A)-B(2A)  | 82.45(13)   |
| C(1A)-B(3A)-B(7A)-B(8A)  | -101.55(14) |
| B(4A)-B(3A)-B(7A)-B(8A)  | -44.79(11)  |
| B(2A)-B(3A)-B(7A)-B(8A)  | -127.24(13) |
| C(1A)-B(3A)-B(7A)-B(6A)  | -18.81(16)  |
| B(8A)-B(3A)-B(7A)-B(6A)  | 82.74(13)   |
| B(4A)-B(3A)-B(7A)-B(6A)  | 37.95(15)   |
| B(2A)-B(3A)-B(7A)-B(6A)  | -44.50(12)  |
| B(2A)-B(6A)-B(7A)-B(10A) | 153.70(14)  |
| B(5A)-B(6A)-B(7A)-B(10A) | 108.29(14)  |
| B(9A)-B(6A)-B(7A)-B(10A) | 49.77(11)   |
| B(10A)-B(6A)-B(7A)-B(2A) | -153.70(14) |
| B(5A)-B(6A)-B(7A)-B(2A)  | -45.42(11)  |
| B(9A)-B(6A)-B(7A)-B(2A)  | -103.94(12) |
| B(10A)-B(6A)-B(7A)-B(3A) | -108.22(14) |
| B(2A)-B(6A)-B(7A)-B(3A)  | 45.49(12)   |
| B(5A)-B(6A)-B(7A)-B(3A)  | 0.07(15)    |
| B(9A)-B(6A)-B(7A)-B(3A)  | -58.45(13)  |
| B(10A)-B(6A)-B(7A)-B(8A) | -49.62(11)  |
| B(2A)-B(6A)-B(7A)-B(8A)  | 104.08(12)  |
| B(5A)-B(6A)-B(7A)-B(8A)  | 58.67(13)   |
| B(9A)-B(6A)-B(7A)-B(8A)  | 0.15(12)    |

|                          |             |
|--------------------------|-------------|
| C(1A)-B(3A)-B(8A)-B(10A) | 77.28(17)   |
| B(7A)-B(3A)-B(8A)-B(10A) | -23.89(14)  |
| B(4A)-B(3A)-B(8A)-B(10A) | 103.21(15)  |
| B(2A)-B(3A)-B(8A)-B(10A) | 20.53(18)   |
| C(1A)-B(3A)-B(8A)-B(4A)  | -25.93(12)  |
| B(7A)-B(3A)-B(8A)-B(4A)  | -127.10(13) |
| B(2A)-B(3A)-B(8A)-B(4A)  | -82.69(12)  |
| C(1A)-B(3A)-B(8A)-B(9A)  | 18.24(15)   |
| B(7A)-B(3A)-B(8A)-B(9A)  | -82.93(12)  |
| B(4A)-B(3A)-B(8A)-B(9A)  | 44.17(11)   |
| B(2A)-B(3A)-B(8A)-B(9A)  | -38.52(14)  |
| C(1A)-B(3A)-B(8A)-B(7A)  | 101.18(14)  |
| B(4A)-B(3A)-B(8A)-B(7A)  | 127.10(13)  |
| B(2A)-B(3A)-B(8A)-B(7A)  | 44.42(12)   |
| C(1A)-B(4A)-B(8A)-B(10A) | -77.66(17)  |
| B(9A)-B(4A)-B(8A)-B(10A) | 23.71(13)   |
| B(3A)-B(4A)-B(8A)-B(10A) | -103.78(15) |
| B(5A)-B(4A)-B(8A)-B(10A) | -20.79(17)  |
| C(1A)-B(4A)-B(8A)-B(3A)  | 26.12(12)   |
| B(9A)-B(4A)-B(8A)-B(3A)  | 127.49(12)  |
| B(5A)-B(4A)-B(8A)-B(3A)  | 82.99(12)   |
| C(1A)-B(4A)-B(8A)-B(9A)  | -101.37(13) |
| B(3A)-B(4A)-B(8A)-B(9A)  | -127.49(12) |
| B(5A)-B(4A)-B(8A)-B(9A)  | -44.50(11)  |
| C(1A)-B(4A)-B(8A)-B(7A)  | -18.43(16)  |
| B(9A)-B(4A)-B(8A)-B(7A)  | 82.93(13)   |
| B(3A)-B(4A)-B(8A)-B(7A)  | -44.55(12)  |
| B(5A)-B(4A)-B(8A)-B(7A)  | 38.43(15)   |
| B(2A)-B(7A)-B(8A)-B(10A) | 108.02(15)  |
| B(3A)-B(7A)-B(8A)-B(10A) | 153.45(15)  |
| B(6A)-B(7A)-B(8A)-B(10A) | 49.46(12)   |
| B(10A)-B(7A)-B(8A)-B(3A) | -153.45(15) |
| B(2A)-B(7A)-B(8A)-B(3A)  | -45.43(12)  |
| B(6A)-B(7A)-B(8A)-B(3A)  | -103.99(13) |
| B(10A)-B(7A)-B(8A)-B(4A) | -108.11(14) |
| B(2A)-B(7A)-B(8A)-B(4A)  | -0.09(16)   |
| B(3A)-B(7A)-B(8A)-B(4A)  | 45.34(12)   |
| B(6A)-B(7A)-B(8A)-B(4A)  | -58.65(13)  |
| B(10A)-B(7A)-B(8A)-B(9A) | -49.61(12)  |
| B(2A)-B(7A)-B(8A)-B(9A)  | 58.41(13)   |
| B(3A)-B(7A)-B(8A)-B(9A)  | 103.84(12)  |
| B(6A)-B(7A)-B(8A)-B(9A)  | -0.15(12)   |
| C(1A)-B(4A)-B(9A)-B(10A) | 77.89(17)   |
| B(8A)-B(4A)-B(9A)-B(10A) | -23.84(13)  |
| B(3A)-B(4A)-B(9A)-B(10A) | 20.62(16)   |
| B(5A)-B(4A)-B(9A)-B(10A) | 103.56(14)  |
| C(1A)-B(4A)-B(9A)-B(5A)  | -25.67(13)  |
| B(8A)-B(4A)-B(9A)-B(5A)  | -127.41(13) |
| B(3A)-B(4A)-B(9A)-B(5A)  | -82.94(12)  |
| C(1A)-B(4A)-B(9A)-B(8A)  | 101.73(14)  |
| B(3A)-B(4A)-B(9A)-B(8A)  | 44.46(11)   |
| B(5A)-B(4A)-B(9A)-B(8A)  | 127.41(13)  |
| C(1A)-B(4A)-B(9A)-B(6A)  | 18.87(16)   |
| B(8A)-B(4A)-B(9A)-B(6A)  | -82.86(13)  |
| B(3A)-B(4A)-B(9A)-B(6A)  | -38.40(14)  |
| B(5A)-B(4A)-B(9A)-B(6A)  | 44.54(11)   |

|                          |             |
|--------------------------|-------------|
| C(1A)-B(5A)-B(9A)-B(10A) | -78.24(16)  |
| B(6A)-B(5A)-B(9A)-B(10A) | 23.22(13)   |
| B(4A)-B(5A)-B(9A)-B(10A) | -103.86(15) |
| B(2A)-B(5A)-B(9A)-B(10A) | -21.54(16)  |
| C(1A)-B(5A)-B(9A)-B(4A)  | 25.62(12)   |
| B(6A)-B(5A)-B(9A)-B(4A)  | 127.08(13)  |
| B(2A)-B(5A)-B(9A)-B(4A)  | 82.33(12)   |
| C(1A)-B(5A)-B(9A)-B(8A)  | -18.87(16)  |
| B(6A)-B(5A)-B(9A)-B(8A)  | 82.58(12)   |
| B(4A)-B(5A)-B(9A)-B(8A)  | -44.50(11)  |
| B(2A)-B(5A)-B(9A)-B(8A)  | 37.83(14)   |
| C(1A)-B(5A)-B(9A)-B(6A)  | -101.46(15) |
| B(4A)-B(5A)-B(9A)-B(6A)  | -127.08(13) |
| B(2A)-B(5A)-B(9A)-B(6A)  | -44.76(11)  |
| B(3A)-B(8A)-B(9A)-B(10A) | 108.45(14)  |
| B(4A)-B(8A)-B(9A)-B(10A) | 153.52(14)  |
| B(7A)-B(8A)-B(9A)-B(10A) | 49.76(11)   |
| B(10A)-B(8A)-B(9A)-B(4A) | -153.52(14) |
| B(3A)-B(8A)-B(9A)-B(4A)  | -45.07(11)  |
| B(7A)-B(8A)-B(9A)-B(4A)  | -103.76(12) |
| B(10A)-B(8A)-B(9A)-B(5A) | -108.14(14) |
| B(3A)-B(8A)-B(9A)-B(5A)  | 0.31(14)    |
| B(4A)-B(8A)-B(9A)-B(5A)  | 45.38(11)   |
| B(7A)-B(8A)-B(9A)-B(5A)  | -58.38(13)  |
| B(10A)-B(8A)-B(9A)-B(6A) | -49.61(11)  |
| B(3A)-B(8A)-B(9A)-B(6A)  | 58.84(13)   |
| B(4A)-B(8A)-B(9A)-B(6A)  | 103.91(11)  |
| B(7A)-B(8A)-B(9A)-B(6A)  | 0.15(12)    |
| B(2A)-B(6A)-B(9A)-B(10A) | -108.29(15) |
| B(5A)-B(6A)-B(9A)-B(10A) | -154.12(15) |
| B(7A)-B(6A)-B(9A)-B(10A) | -49.92(12)  |
| B(10A)-B(6A)-B(9A)-B(4A) | 108.57(14)  |
| B(2A)-B(6A)-B(9A)-B(4A)  | 0.27(15)    |
| B(5A)-B(6A)-B(9A)-B(4A)  | -45.55(11)  |
| B(7A)-B(6A)-B(9A)-B(4A)  | 58.65(13)   |
| B(10A)-B(6A)-B(9A)-B(5A) | 154.12(15)  |
| B(2A)-B(6A)-B(9A)-B(5A)  | 45.83(12)   |
| B(7A)-B(6A)-B(9A)-B(5A)  | 104.20(13)  |
| B(10A)-B(6A)-B(9A)-B(8A) | 49.77(12)   |
| B(2A)-B(6A)-B(9A)-B(8A)  | -58.52(13)  |
| B(5A)-B(6A)-B(9A)-B(8A)  | -104.35(12) |
| B(7A)-B(6A)-B(9A)-B(8A)  | -0.15(12)   |
| B(2A)-B(6A)-B(10A)-B(9A) | 90.35(14)   |
| B(5A)-B(6A)-B(10A)-B(9A) | 23.85(14)   |
| B(7A)-B(6A)-B(10A)-B(9A) | 114.52(13)  |
| B(2A)-B(6A)-B(10A)-B(8A) | 33.01(18)   |
| B(5A)-B(6A)-B(10A)-B(8A) | -33.49(19)  |
| B(9A)-B(6A)-B(10A)-B(8A) | -57.34(12)  |
| B(7A)-B(6A)-B(10A)-B(8A) | 57.18(13)   |
| B(2A)-B(6A)-B(10A)-B(7A) | -24.17(13)  |
| B(5A)-B(6A)-B(10A)-B(7A) | -90.67(15)  |
| B(9A)-B(6A)-B(10A)-B(7A) | -114.52(13) |
| B(4A)-B(9A)-B(10A)-B(6A) | -90.27(14)  |
| B(5A)-B(9A)-B(10A)-B(6A) | -23.85(13)  |
| B(8A)-B(9A)-B(10A)-B(6A) | -114.75(13) |
| B(4A)-B(9A)-B(10A)-B(8A) | 24.48(13)   |

|                          |             |
|--------------------------|-------------|
| B(5A)-B(9A)-B(10A)-B(8A) | 90.91(14)   |
| B(6A)-B(9A)-B(10A)-B(8A) | 114.75(13)  |
| B(4A)-B(9A)-B(10A)-B(7A) | -32.72(16)  |
| B(5A)-B(9A)-B(10A)-B(7A) | 33.70(17)   |
| B(8A)-B(9A)-B(10A)-B(7A) | -57.20(12)  |
| B(6A)-B(9A)-B(10A)-B(7A) | 57.55(12)   |
| B(3A)-B(8A)-B(10A)-B(6A) | -32.82(18)  |
| B(4A)-B(8A)-B(10A)-B(6A) | 33.17(18)   |
| B(9A)-B(8A)-B(10A)-B(6A) | 57.48(13)   |
| B(7A)-B(8A)-B(10A)-B(6A) | -57.32(13)  |
| B(3A)-B(8A)-B(10A)-B(9A) | -90.31(14)  |
| B(4A)-B(8A)-B(10A)-B(9A) | -24.32(13)  |
| B(7A)-B(8A)-B(10A)-B(9A) | -114.80(13) |
| B(3A)-B(8A)-B(10A)-B(7A) | 24.50(14)   |
| B(4A)-B(8A)-B(10A)-B(7A) | 90.49(14)   |
| B(9A)-B(8A)-B(10A)-B(7A) | 114.80(13)  |
| B(2A)-B(7A)-B(10A)-B(6A) | 24.19(13)   |
| B(3A)-B(7A)-B(10A)-B(6A) | 90.44(14)   |
| B(8A)-B(7A)-B(10A)-B(6A) | 114.89(13)  |
| B(2A)-B(7A)-B(10A)-B(9A) | -33.43(16)  |
| B(3A)-B(7A)-B(10A)-B(9A) | 32.82(17)   |
| B(8A)-B(7A)-B(10A)-B(9A) | 57.27(12)   |
| B(6A)-B(7A)-B(10A)-B(9A) | -57.62(12)  |
| B(2A)-B(7A)-B(10A)-B(8A) | -90.70(14)  |
| B(3A)-B(7A)-B(10A)-B(8A) | -24.45(13)  |
| B(6A)-B(7A)-B(10A)-B(8A) | -114.89(13) |
| B(5B)-C(1B)-B(2B)-B(6B)  | -27.00(15)  |
| B(4B)-C(1B)-B(2B)-B(6B)  | 32.7(2)     |
| B(3B)-C(1B)-B(2B)-B(6B)  | 92.08(16)   |
| B(5B)-C(1B)-B(2B)-B(7B)  | -91.84(15)  |
| B(4B)-C(1B)-B(2B)-B(7B)  | -32.1(2)    |
| B(3B)-C(1B)-B(2B)-B(7B)  | 27.24(15)   |
| B(4B)-C(1B)-B(2B)-B(5B)  | 59.74(16)   |
| B(3B)-C(1B)-B(2B)-B(5B)  | 119.08(16)  |
| B(5B)-C(1B)-B(2B)-B(3B)  | -119.08(16) |
| B(4B)-C(1B)-B(2B)-B(3B)  | -59.34(17)  |
| B(5B)-C(1B)-B(3B)-B(8B)  | -31.7(2)    |
| B(2B)-C(1B)-B(3B)-B(8B)  | -91.88(16)  |
| B(4B)-C(1B)-B(3B)-B(8B)  | 28.00(16)   |
| B(5B)-C(1B)-B(3B)-B(7B)  | 33.1(2)     |
| B(2B)-C(1B)-B(3B)-B(7B)  | -27.09(14)  |
| B(4B)-C(1B)-B(3B)-B(7B)  | 92.79(16)   |
| B(5B)-C(1B)-B(3B)-B(4B)  | -59.69(15)  |
| B(2B)-C(1B)-B(3B)-B(4B)  | -119.88(15) |
| B(5B)-C(1B)-B(3B)-B(2B)  | 60.19(14)   |
| B(4B)-C(1B)-B(3B)-B(2B)  | 119.88(15)  |
| B(6B)-B(2B)-B(3B)-C(1B)  | -104.22(15) |
| B(7B)-B(2B)-B(3B)-C(1B)  | -149.81(16) |
| B(5B)-B(2B)-B(3B)-C(1B)  | -45.51(13)  |
| C(1B)-B(2B)-B(3B)-B(8B)  | 104.43(17)  |
| B(6B)-B(2B)-B(3B)-B(8B)  | 0.20(18)    |
| B(7B)-B(2B)-B(3B)-B(8B)  | -45.39(15)  |
| B(5B)-B(2B)-B(3B)-B(8B)  | 58.92(16)   |
| C(1B)-B(2B)-B(3B)-B(7B)  | 149.81(16)  |
| B(6B)-B(2B)-B(3B)-B(7B)  | 45.59(12)   |
| B(5B)-B(2B)-B(3B)-B(7B)  | 104.31(13)  |



|                         |             |
|-------------------------|-------------|
| C(1B)-B(2B)-B(3B)-B(4B) | 45.20(15)   |
| B(6B)-B(2B)-B(3B)-B(4B) | -59.02(17)  |
| B(7B)-B(2B)-B(3B)-B(4B) | -104.61(16) |
| B(5B)-B(2B)-B(3B)-B(4B) | -0.30(16)   |
| B(5B)-C(1B)-B(4B)-B(9B) | 27.30(16)   |
| B(2B)-C(1B)-B(4B)-B(9B) | -32.6(2)    |
| B(3B)-C(1B)-B(4B)-B(9B) | -92.12(18)  |
| B(5B)-C(1B)-B(4B)-B(8B) | 91.75(17)   |
| B(2B)-C(1B)-B(4B)-B(8B) | 31.8(2)     |
| B(3B)-C(1B)-B(4B)-B(8B) | -27.67(16)  |
| B(2B)-C(1B)-B(4B)-B(5B) | -59.91(15)  |
| B(3B)-C(1B)-B(4B)-B(5B) | -119.42(15) |
| B(5B)-C(1B)-B(4B)-B(3B) | 119.42(15)  |
| B(2B)-C(1B)-B(4B)-B(3B) | 59.50(16)   |
| B(8B)-B(3B)-B(4B)-C(1B) | -149.09(17) |
| B(7B)-B(3B)-B(4B)-C(1B) | -103.61(16) |
| B(2B)-B(3B)-B(4B)-C(1B) | -45.10(13)  |
| C(1B)-B(3B)-B(4B)-B(9B) | 103.94(16)  |
| B(8B)-B(3B)-B(4B)-B(9B) | -45.15(14)  |
| B(7B)-B(3B)-B(4B)-B(9B) | 0.33(19)    |
| B(2B)-B(3B)-B(4B)-B(9B) | 58.84(17)   |
| C(1B)-B(3B)-B(4B)-B(8B) | 149.09(17)  |
| B(7B)-B(3B)-B(4B)-B(8B) | 45.48(15)   |
| B(2B)-B(3B)-B(4B)-B(8B) | 103.99(15)  |
| C(1B)-B(3B)-B(4B)-B(5B) | 45.40(13)   |
| B(8B)-B(3B)-B(4B)-B(5B) | -103.68(15) |
| B(7B)-B(3B)-B(4B)-B(5B) | -58.20(17)  |
| B(2B)-B(3B)-B(4B)-B(5B) | 0.31(16)    |
| B(2B)-C(1B)-B(5B)-B(9B) | 92.07(15)   |
| B(4B)-C(1B)-B(5B)-B(9B) | -27.54(16)  |
| B(3B)-C(1B)-B(5B)-B(9B) | 32.03(19)   |
| B(2B)-C(1B)-B(5B)-B(6B) | 26.73(14)   |
| B(4B)-C(1B)-B(5B)-B(6B) | -92.88(16)  |
| B(3B)-C(1B)-B(5B)-B(6B) | -33.32(19)  |
| B(2B)-C(1B)-B(5B)-B(4B) | 119.60(17)  |
| B(3B)-C(1B)-B(5B)-B(4B) | 59.56(16)   |
| B(4B)-C(1B)-B(5B)-B(2B) | -119.60(17) |
| B(3B)-C(1B)-B(5B)-B(2B) | -60.04(14)  |
| B(9B)-B(4B)-B(5B)-C(1B) | -149.54(17) |
| B(8B)-B(4B)-B(5B)-C(1B) | -104.11(17) |
| B(3B)-B(4B)-B(5B)-C(1B) | -45.67(15)  |
| C(1B)-B(4B)-B(5B)-B(9B) | 149.54(17)  |
| B(8B)-B(4B)-B(5B)-B(9B) | 45.43(14)   |
| B(3B)-B(4B)-B(5B)-B(9B) | 103.87(17)  |
| C(1B)-B(4B)-B(5B)-B(6B) | 103.45(16)  |
| B(9B)-B(4B)-B(5B)-B(6B) | -46.09(12)  |
| B(8B)-B(4B)-B(5B)-B(6B) | -0.66(17)   |
| B(3B)-B(4B)-B(5B)-B(6B) | 57.78(17)   |
| C(1B)-B(4B)-B(5B)-B(2B) | 45.36(14)   |
| B(9B)-B(4B)-B(5B)-B(2B) | -104.18(13) |
| B(8B)-B(4B)-B(5B)-B(2B) | -58.75(15)  |
| B(3B)-B(4B)-B(5B)-B(2B) | -0.31(16)   |
| B(6B)-B(2B)-B(5B)-C(1B) | 150.04(17)  |
| B(7B)-B(2B)-B(5B)-C(1B) | 104.50(16)  |
| B(3B)-B(2B)-B(5B)-C(1B) | 45.78(15)   |
| C(1B)-B(2B)-B(5B)-B(9B) | -104.44(17) |

|                          |             |
|--------------------------|-------------|
| B(6B)-B(2B)-B(5B)-B(9B)  | 45.60(12)   |
| B(7B)-B(2B)-B(5B)-B(9B)  | 0.06(15)    |
| B(3B)-B(2B)-B(5B)-B(9B)  | -58.65(15)  |
| C(1B)-B(2B)-B(5B)-B(6B)  | -150.04(17) |
| B(7B)-B(2B)-B(5B)-B(6B)  | -45.54(11)  |
| B(3B)-B(2B)-B(5B)-B(6B)  | -104.26(14) |
| C(1B)-B(2B)-B(5B)-B(4B)  | -45.48(15)  |
| B(6B)-B(2B)-B(5B)-B(4B)  | 104.56(14)  |
| B(7B)-B(2B)-B(5B)-B(4B)  | 59.02(15)   |
| B(3B)-B(2B)-B(5B)-B(4B)  | 0.31(16)    |
| C(1B)-B(2B)-B(6B)-B(10B) | -78.27(19)  |
| B(7B)-B(2B)-B(6B)-B(10B) | 23.40(14)   |
| B(5B)-B(2B)-B(6B)-B(10B) | -103.73(15) |
| B(3B)-B(2B)-B(6B)-B(10B) | -21.32(18)  |
| C(1B)-B(2B)-B(6B)-B(5B)  | 25.45(15)   |
| B(7B)-B(2B)-B(6B)-B(5B)  | 127.13(12)  |
| B(3B)-B(2B)-B(6B)-B(5B)  | 82.40(13)   |
| C(1B)-B(2B)-B(6B)-B(7B)  | -101.67(16) |
| B(5B)-B(2B)-B(6B)-B(7B)  | -127.13(12) |
| B(3B)-B(2B)-B(6B)-B(7B)  | -44.72(13)  |
| C(1B)-B(2B)-B(6B)-B(9B)  | -18.77(18)  |
| B(7B)-B(2B)-B(6B)-B(9B)  | 82.91(12)   |
| B(5B)-B(2B)-B(6B)-B(9B)  | -44.22(11)  |
| B(3B)-B(2B)-B(6B)-B(9B)  | 38.18(15)   |
| C(1B)-B(5B)-B(6B)-B(10B) | 79.40(18)   |
| B(9B)-B(5B)-B(6B)-B(10B) | -22.63(14)  |
| B(4B)-B(5B)-B(6B)-B(10B) | 22.37(18)   |
| B(2B)-B(5B)-B(6B)-B(10B) | 104.86(15)  |
| C(1B)-B(5B)-B(6B)-B(2B)  | -25.46(14)  |
| B(9B)-B(5B)-B(6B)-B(2B)  | -127.48(13) |
| B(4B)-B(5B)-B(6B)-B(2B)  | -82.49(14)  |
| C(1B)-B(5B)-B(6B)-B(7B)  | 19.54(17)   |
| B(9B)-B(5B)-B(6B)-B(7B)  | -82.48(12)  |
| B(4B)-B(5B)-B(6B)-B(7B)  | -37.48(15)  |
| B(2B)-B(5B)-B(6B)-B(7B)  | 45.00(11)   |
| C(1B)-B(5B)-B(6B)-B(9B)  | 102.02(16)  |
| B(4B)-B(5B)-B(6B)-B(9B)  | 44.99(12)   |
| B(2B)-B(5B)-B(6B)-B(9B)  | 127.48(13)  |
| C(1B)-B(2B)-B(7B)-B(10B) | 78.16(19)   |
| B(6B)-B(2B)-B(7B)-B(10B) | -23.08(15)  |
| B(5B)-B(2B)-B(7B)-B(10B) | 21.59(18)   |
| B(3B)-B(2B)-B(7B)-B(10B) | 103.97(17)  |
| C(1B)-B(2B)-B(7B)-B(3B)  | -25.81(14)  |
| B(6B)-B(2B)-B(7B)-B(3B)  | -127.06(13) |
| B(5B)-B(2B)-B(7B)-B(3B)  | -82.38(13)  |
| C(1B)-B(2B)-B(7B)-B(6B)  | 101.24(15)  |
| B(5B)-B(2B)-B(7B)-B(6B)  | 44.68(11)   |
| B(3B)-B(2B)-B(7B)-B(6B)  | 127.06(13)  |
| C(1B)-B(2B)-B(7B)-B(8B)  | 18.49(18)   |
| B(6B)-B(2B)-B(7B)-B(8B)  | -82.75(14)  |
| B(5B)-B(2B)-B(7B)-B(8B)  | -38.07(16)  |
| B(3B)-B(2B)-B(7B)-B(8B)  | 44.31(13)   |
| C(1B)-B(3B)-B(7B)-B(10B) | -77.80(19)  |
| B(8B)-B(3B)-B(7B)-B(10B) | 23.92(15)   |
| B(4B)-B(3B)-B(7B)-B(10B) | -20.9(2)    |
| B(2B)-B(3B)-B(7B)-B(10B) | -103.42(16) |

|                          |             |
|--------------------------|-------------|
| C(1B)-B(3B)-B(7B)-B(2B)  | 25.62(14)   |
| B(8B)-B(3B)-B(7B)-B(2B)  | 127.34(14)  |
| B(4B)-B(3B)-B(7B)-B(2B)  | 82.50(15)   |
| C(1B)-B(3B)-B(7B)-B(6B)  | -18.71(18)  |
| B(8B)-B(3B)-B(7B)-B(6B)  | 83.00(14)   |
| B(4B)-B(3B)-B(7B)-B(6B)  | 38.16(17)   |
| B(2B)-B(3B)-B(7B)-B(6B)  | -44.34(11)  |
| C(1B)-B(3B)-B(7B)-B(8B)  | -101.72(17) |
| B(4B)-B(3B)-B(7B)-B(8B)  | -44.84(14)  |
| B(2B)-B(3B)-B(7B)-B(8B)  | -127.34(14) |
| B(2B)-B(6B)-B(7B)-B(10B) | 154.30(16)  |
| B(5B)-B(6B)-B(7B)-B(10B) | 108.35(16)  |
| B(9B)-B(6B)-B(7B)-B(10B) | 50.03(14)   |
| B(10B)-B(6B)-B(7B)-B(2B) | -154.30(16) |
| B(5B)-B(6B)-B(7B)-B(2B)  | -45.94(11)  |
| B(9B)-B(6B)-B(7B)-B(2B)  | -104.26(13) |
| B(10B)-B(6B)-B(7B)-B(3B) | -108.76(16) |
| B(2B)-B(6B)-B(7B)-B(3B)  | 45.54(12)   |
| B(5B)-B(6B)-B(7B)-B(3B)  | -0.40(15)   |
| B(9B)-B(6B)-B(7B)-B(3B)  | -58.72(14)  |
| B(10B)-B(6B)-B(7B)-B(8B) | -50.24(15)  |
| B(2B)-B(6B)-B(7B)-B(8B)  | 104.05(15)  |
| B(5B)-B(6B)-B(7B)-B(8B)  | 58.11(16)   |
| B(9B)-B(6B)-B(7B)-B(8B)  | -0.21(16)   |
| C(1B)-B(3B)-B(8B)-B(10B) | 77.2(2)     |
| B(7B)-B(3B)-B(8B)-B(10B) | -23.78(16)  |
| B(4B)-B(3B)-B(8B)-B(10B) | 103.57(17)  |
| B(2B)-B(3B)-B(8B)-B(10B) | 20.6(2)     |
| C(1B)-B(3B)-B(8B)-B(4B)  | -26.35(15)  |
| B(7B)-B(3B)-B(8B)-B(4B)  | -127.35(14) |
| B(2B)-B(3B)-B(8B)-B(4B)  | -82.97(15)  |
| C(1B)-B(3B)-B(8B)-B(7B)  | 101.00(16)  |
| B(4B)-B(3B)-B(8B)-B(7B)  | 127.35(14)  |
| B(2B)-B(3B)-B(8B)-B(7B)  | 44.38(12)   |
| C(1B)-B(3B)-B(8B)-B(9B)  | 17.9(2)     |
| B(7B)-B(3B)-B(8B)-B(9B)  | -83.06(15)  |
| B(4B)-B(3B)-B(8B)-B(9B)  | 44.29(13)   |
| B(2B)-B(3B)-B(8B)-B(9B)  | -38.68(19)  |
| C(1B)-B(4B)-B(8B)-B(10B) | -77.45(19)  |
| B(9B)-B(4B)-B(8B)-B(10B) | 23.63(14)   |
| B(5B)-B(4B)-B(8B)-B(10B) | -20.88(19)  |
| B(3B)-B(4B)-B(8B)-B(10B) | -103.81(16) |
| C(1B)-B(4B)-B(8B)-B(3B)  | 26.36(15)   |
| B(9B)-B(4B)-B(8B)-B(3B)  | 127.44(13)  |
| B(5B)-B(4B)-B(8B)-B(3B)  | 82.93(14)   |
| C(1B)-B(4B)-B(8B)-B(7B)  | -18.2(2)    |
| B(9B)-B(4B)-B(8B)-B(7B)  | 82.83(14)   |
| B(5B)-B(4B)-B(8B)-B(7B)  | 38.33(17)   |
| B(3B)-B(4B)-B(8B)-B(7B)  | -44.61(13)  |
| C(1B)-B(4B)-B(8B)-B(9B)  | -101.08(16) |
| B(5B)-B(4B)-B(8B)-B(9B)  | -44.51(12)  |
| B(3B)-B(4B)-B(8B)-B(9B)  | -127.44(13) |
| B(2B)-B(7B)-B(8B)-B(10B) | 108.18(15)  |
| B(3B)-B(7B)-B(8B)-B(10B) | 153.56(17)  |
| B(6B)-B(7B)-B(8B)-B(10B) | 49.90(13)   |
| B(10B)-B(7B)-B(8B)-B(3B) | -153.56(17) |

|                          |             |
|--------------------------|-------------|
| B(2B)-B(7B)-B(8B)-B(3B)  | -45.38(14)  |
| B(6B)-B(7B)-B(8B)-B(3B)  | -103.66(15) |
| B(10B)-B(7B)-B(8B)-B(4B) | -108.28(16) |
| B(2B)-B(7B)-B(8B)-B(4B)  | -0.10(17)   |
| B(3B)-B(7B)-B(8B)-B(4B)  | 45.28(15)   |
| B(6B)-B(7B)-B(8B)-B(4B)  | -58.37(16)  |
| B(10B)-B(7B)-B(8B)-B(9B) | -49.69(14)  |
| B(2B)-B(7B)-B(8B)-B(9B)  | 58.48(17)   |
| B(3B)-B(7B)-B(8B)-B(9B)  | 103.87(17)  |
| B(6B)-B(7B)-B(8B)-B(9B)  | 0.21(16)    |
| C(1B)-B(5B)-B(9B)-B(10B) | -78.49(19)  |
| B(6B)-B(5B)-B(9B)-B(10B) | 22.39(15)   |
| B(4B)-B(5B)-B(9B)-B(10B) | -104.53(17) |
| B(2B)-B(5B)-B(9B)-B(10B) | -21.66(19)  |
| C(1B)-B(5B)-B(9B)-B(4B)  | 26.04(14)   |
| B(6B)-B(5B)-B(9B)-B(4B)  | 126.93(13)  |
| B(2B)-B(5B)-B(9B)-B(4B)  | 82.87(14)   |
| C(1B)-B(5B)-B(9B)-B(8B)  | -18.86(19)  |
| B(6B)-B(5B)-B(9B)-B(8B)  | 82.03(14)   |
| B(4B)-B(5B)-B(9B)-B(8B)  | -44.90(14)  |
| B(2B)-B(5B)-B(9B)-B(8B)  | 37.97(16)   |
| C(1B)-B(5B)-B(9B)-B(6B)  | -100.88(15) |
| B(4B)-B(5B)-B(9B)-B(6B)  | -126.93(13) |
| B(2B)-B(5B)-B(9B)-B(6B)  | -44.06(11)  |
| C(1B)-B(4B)-B(9B)-B(10B) | 77.3(2)     |
| B(8B)-B(4B)-B(9B)-B(10B) | -23.82(14)  |
| B(5B)-B(4B)-B(9B)-B(10B) | 103.20(15)  |
| B(3B)-B(4B)-B(9B)-B(10B) | 20.3(2)     |
| C(1B)-B(4B)-B(9B)-B(5B)  | -25.86(16)  |
| B(8B)-B(4B)-B(9B)-B(5B)  | -127.02(14) |
| B(3B)-B(4B)-B(9B)-B(5B)  | -82.86(15)  |
| C(1B)-B(4B)-B(9B)-B(8B)  | 101.17(18)  |
| B(5B)-B(4B)-B(9B)-B(8B)  | 127.02(14)  |
| B(3B)-B(4B)-B(9B)-B(8B)  | 44.17(14)   |
| C(1B)-B(4B)-B(9B)-B(6B)  | 18.7(2)     |
| B(8B)-B(4B)-B(9B)-B(6B)  | -82.46(13)  |
| B(5B)-B(4B)-B(9B)-B(6B)  | 44.57(12)   |
| B(3B)-B(4B)-B(9B)-B(6B)  | -38.29(17)  |
| B(3B)-B(8B)-B(9B)-B(10B) | 108.58(16)  |
| B(4B)-B(8B)-B(9B)-B(10B) | 153.75(16)  |
| B(7B)-B(8B)-B(9B)-B(10B) | 49.60(14)   |
| B(10B)-B(8B)-B(9B)-B(5B) | -108.14(15) |
| B(3B)-B(8B)-B(9B)-B(5B)  | 0.44(18)    |
| B(4B)-B(8B)-B(9B)-B(5B)  | 45.61(13)   |
| B(7B)-B(8B)-B(9B)-B(5B)  | -58.54(17)  |
| B(10B)-B(8B)-B(9B)-B(4B) | -153.75(16) |
| B(3B)-B(8B)-B(9B)-B(4B)  | -45.17(14)  |
| B(7B)-B(8B)-B(9B)-B(4B)  | -104.15(16) |
| B(10B)-B(8B)-B(9B)-B(6B) | -49.81(12)  |
| B(3B)-B(8B)-B(9B)-B(6B)  | 58.77(16)   |
| B(4B)-B(8B)-B(9B)-B(6B)  | 103.94(13)  |
| B(7B)-B(8B)-B(9B)-B(6B)  | -0.21(15)   |
| B(2B)-B(6B)-B(9B)-B(10B) | -109.36(16) |
| B(5B)-B(6B)-B(9B)-B(10B) | -154.95(17) |
| B(7B)-B(6B)-B(9B)-B(10B) | -50.21(14)  |
| B(10B)-B(6B)-B(9B)-B(5B) | 154.95(17)  |

|                          |             |
|--------------------------|-------------|
| B(2B)-B(6B)-B(9B)-B(5B)  | 45.59(12)   |
| B(7B)-B(6B)-B(9B)-B(5B)  | 104.75(13)  |
| B(10B)-B(6B)-B(9B)-B(4B) | 109.37(17)  |
| B(2B)-B(6B)-B(9B)-B(4B)  | 0.00(16)    |
| B(5B)-B(6B)-B(9B)-B(4B)  | -45.59(14)  |
| B(7B)-B(6B)-B(9B)-B(4B)  | 59.16(15)   |
| B(10B)-B(6B)-B(9B)-B(8B) | 50.42(15)   |
| B(2B)-B(6B)-B(9B)-B(8B)  | -58.94(16)  |
| B(5B)-B(6B)-B(9B)-B(8B)  | -104.54(16) |
| B(7B)-B(6B)-B(9B)-B(8B)  | 0.21(16)    |
| B(2B)-B(6B)-B(10B)-B(7B) | -24.03(15)  |
| B(5B)-B(6B)-B(10B)-B(7B) | -91.29(15)  |
| B(9B)-B(6B)-B(10B)-B(7B) | -114.40(16) |
| B(2B)-B(6B)-B(10B)-B(9B) | 90.37(15)   |
| B(5B)-B(6B)-B(10B)-B(9B) | 23.10(15)   |
| B(7B)-B(6B)-B(10B)-B(9B) | 114.40(16)  |
| B(2B)-B(6B)-B(10B)-B(8B) | 33.04(18)   |
| B(5B)-B(6B)-B(10B)-B(8B) | -34.22(18)  |
| B(7B)-B(6B)-B(10B)-B(8B) | 57.07(14)   |
| B(9B)-B(6B)-B(10B)-B(8B) | -57.33(14)  |
| B(2B)-B(7B)-B(10B)-B(6B) | 23.59(15)   |
| B(3B)-B(7B)-B(10B)-B(6B) | 90.02(16)   |
| B(8B)-B(7B)-B(10B)-B(6B) | 114.39(16)  |
| B(2B)-B(7B)-B(10B)-B(9B) | -34.03(19)  |
| B(3B)-B(7B)-B(10B)-B(9B) | 32.40(19)   |
| B(6B)-B(7B)-B(10B)-B(9B) | -57.62(13)  |
| B(8B)-B(7B)-B(10B)-B(9B) | 56.77(15)   |
| B(2B)-B(7B)-B(10B)-B(8B) | -90.80(17)  |
| B(3B)-B(7B)-B(10B)-B(8B) | -24.37(16)  |
| B(6B)-B(7B)-B(10B)-B(8B) | -114.39(16) |
| B(5B)-B(9B)-B(10B)-B(6B) | -23.06(15)  |
| B(4B)-B(9B)-B(10B)-B(6B) | -89.52(16)  |
| B(8B)-B(9B)-B(10B)-B(6B) | -113.97(15) |
| B(5B)-B(9B)-B(10B)-B(7B) | 34.11(19)   |
| B(4B)-B(9B)-B(10B)-B(7B) | -32.36(19)  |
| B(8B)-B(9B)-B(10B)-B(7B) | -56.80(14)  |
| B(6B)-B(9B)-B(10B)-B(7B) | 57.17(12)   |
| B(5B)-B(9B)-B(10B)-B(8B) | 90.91(16)   |
| B(4B)-B(9B)-B(10B)-B(8B) | 24.45(15)   |
| B(6B)-B(9B)-B(10B)-B(8B) | 113.97(15)  |
| B(3B)-B(8B)-B(10B)-B(6B) | -32.6(2)    |
| B(4B)-B(8B)-B(10B)-B(6B) | 33.63(19)   |
| B(7B)-B(8B)-B(10B)-B(6B) | -57.08(13)  |
| B(9B)-B(8B)-B(10B)-B(6B) | 57.83(13)   |
| B(3B)-B(8B)-B(10B)-B(7B) | 24.49(16)   |
| B(4B)-B(8B)-B(10B)-B(7B) | 90.70(17)   |
| B(9B)-B(8B)-B(10B)-B(7B) | 114.91(15)  |
| B(3B)-B(8B)-B(10B)-B(9B) | -90.41(18)  |
| B(4B)-B(8B)-B(10B)-B(9B) | -24.20(15)  |
| B(7B)-B(8B)-B(10B)-B(9B) | -114.91(15) |

---

Symmetry transformations used to generate equivalent atoms:

## Ionic Conductivity

Experimental: Conductivity of the electrolyte was measured using an electrochemical cell with two symmetric Pt film-electrodes. Potentiostatic EIS program from Gamry reference 1000 potentiostat was used to measure the impedance across the cell for each concentration. Conductivity was calculated by using the following equation

$$\sigma = \frac{l}{RA}$$

where  $\sigma$  is the conductivity,  $l$  is the distance between the electrodes,  $A$  is the cross sectional area and  $R$  is the resistance. The cell was calibrated using standard aqueous KCl solution.

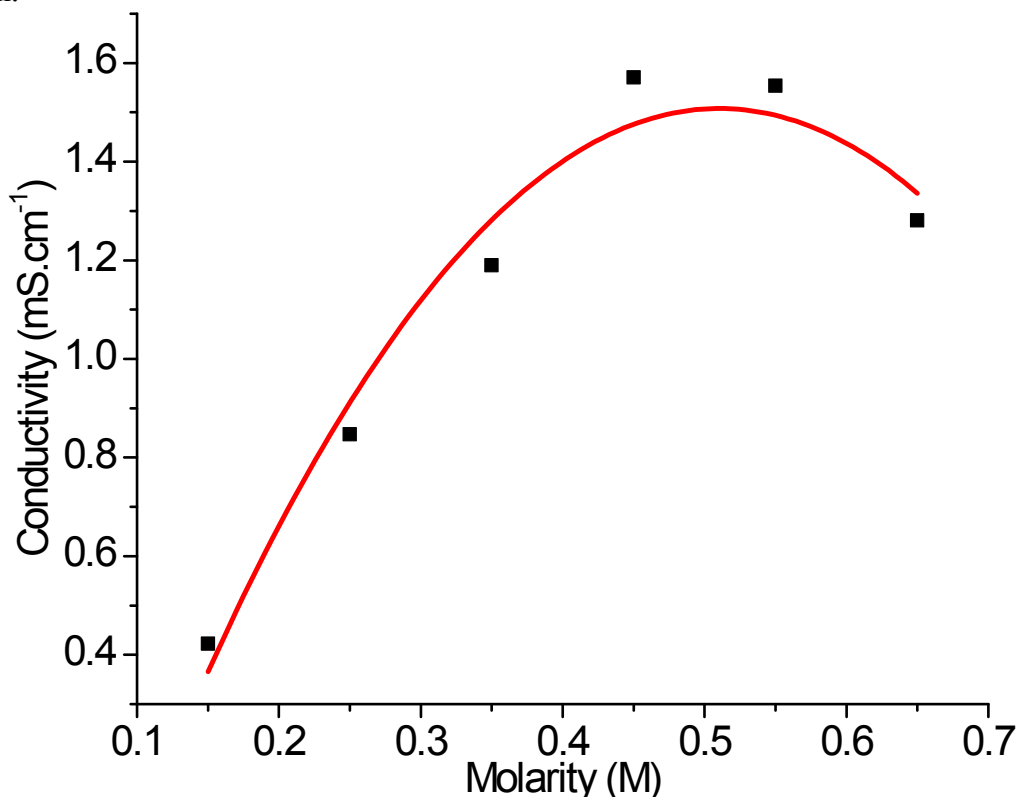

Figure S5. Ionic conductivity of 2[Mg] in G4 as function of salt concentration.

## Electrochemical performance of Mg-Mo<sub>6</sub>S<sub>8</sub> Cells

Experimental: Mg-ion battery performances were demonstrated with coin cells (CR2032) with Mg anode and Chevrel phase Mo<sub>6</sub>S<sub>8</sub> cathode using 0.45 M **Mg(CB<sub>9</sub>H<sub>9</sub>)<sub>2</sub>** in G4. The electrochemical performance of the Mg vs. Mo<sub>6</sub>S<sub>8</sub> battery was tested in 4 cells, and the capacity data are consistent with +/- 10% error. Chevrel phase Mo<sub>6</sub>S<sub>8</sub> was prepared with a method previously established by Aurbach et.al<sup>[5]</sup>, Mo<sub>6</sub>S<sub>8</sub> electrodes were prepared by mixing 70wt% active material, 20% carbon black and 10% polyvinylidene fluoride (PVDF) in N-methyl-2-pyrrolidone (NMP). The mixed paste was then applied as a thin uniform coating on a Ni foil and then dried in a vacuum oven overnight at 50 °C. Cells were assembled in an argon filled glovebox. 6mm diameter disc of Mo<sub>6</sub>S<sub>8</sub> coating on Ni

foil were punched out as the cathode and placed on the bottom base of the CR2032 coin cells, 40 $\mu$ l of the Mg(CB<sub>9</sub>H<sub>9</sub>)<sub>2</sub> in G4 was pipetted onto the cathode. A polypropelene seperator was carefully placed over the cathode and 60 $\mu$ l electrolyte was added (total of 100  $\mu$ l) to wet the seperator surface. A polished Mg disc of 6mm in diameter was placed on the wetted seperator the cell was then filled with two spacers and a washer to fill the base, the top cap was then placed on the top and the cell was hydraulically pressed to seal the cell.

Table S6. Elemental analysis via EDX on the SS coin cell casing surface before and after cycling in Mg-Mo6S8 cell using 2[Mg<sup>2+</sup>] electrolyte.

| Element | Pristine SS surface<br>(wt. %) | SS surface after 30 cycles<br>(wt. %) |
|---------|--------------------------------|---------------------------------------|
| Fe      | 65.1 $\pm$ 0.4                 | 63.3 $\pm$ 0.5                        |
| Cr      | 16.9 $\pm$ 0.2                 | 16.9 $\pm$ 0.2                        |
| Ni      | 7.3 $\pm$ 0.2                  | 7.0 $\pm$ 0.2                         |
| C       | 8.6 $\pm$ 0.4                  | 10.5 $\pm$ 0.5                        |
| Mn      | 0.9 $\pm$ 0.1                  | 0.8 $\pm$ 0.1                         |
| O       | 0.8 $\pm$ 0.1                  | 1.2 $\pm$ 0.2                         |
| Si      | 0.4 $\pm$ 0.1                  | 0.3 $\pm$ 0.1                         |

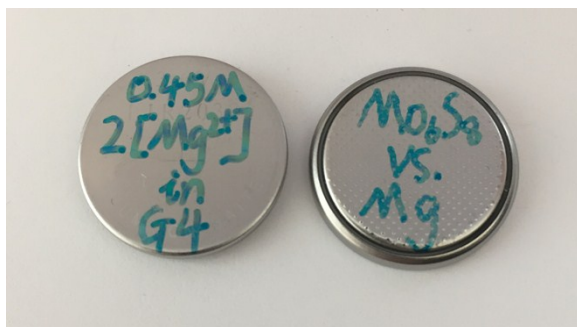

Figure S6. Image of coin cell

## REFERENCES

1. APEX 2, version 2014.1-1, Bruker (2014), Bruker AXS Inc., Madison, Wisconsin, USA.
2. SAINT, version V8.34A, Bruker (2012), Bruker AXS Inc., Madison, Wisconsin, USA.
3. SADABS, version 2012/1, Bruker (2012), Bruker AXS Inc., Madison, Wisconsin, USA.
4. SHELXTL, version 2013/4, Bruker (2013), Bruker AXS Inc., Madison, Wisconsin, USA.

5. Levi, E., Goffer, Y., Vestfreed, Y., Lancry, E., & Aurbach, D. *Chemistry of Materials* 2002 *14* (6), 2767-2773.
